# Supplementary material for: DFT studies on the mechanism of veratryl alcohol oxidation catalyzed by Cu–phen complexes
Source: Royal Society of Chemistry journal article supplement (doi:10.1039/c4ra02896a), 2014-01-01
Supplement: c4ra02896a1.pdf [file c4ra02896a1.pdf]

## Electronic Supplementary Information (ESI)

### **DFT Studies on the Mechanism of Veratryl Alcohol Oxidation Catalyzed by Cu-phen(phen=1,10-phenanthroline) Complexes**

Lisha Ma,<sup>a</sup> Qiancheng Zhang,<sup>a</sup> Lin Cheng,<sup>\*a</sup> Zhijian Wu,<sup>\*b</sup> Jucai Yang,<sup>a</sup>

<sup>a</sup>Key Laboratory of Industrial Catalysis of the Inner Mongolia Autonomous Region,  
Inner Mongolia University of Technology, Huhehot 010051, China

<sup>b</sup>State Key Laboratory of Rare Earth Resource Utilization, Changchun Institute of  
Applied Chemistry, Chinese Academy of Sciences, Changchun 130022, China

Table S1 Cartesian coordinates all structures considered in this work (B3LYP level)

| 0                         |             |             |             | 1                         |             |             |             |
|---------------------------|-------------|-------------|-------------|---------------------------|-------------|-------------|-------------|
| Charge=0 Multiplicity = 2 |             |             |             | Charge=0 Multiplicity = 2 |             |             |             |
| Cu                        | 1.90853100  | -0.01724400 | 0.02665500  | Cu                        | 0.18287100  | -1.11862500 | 1.39846800  |
| O                         | 3.05843800  | 1.38651500  | -0.25804500 | O                         | -0.52766500 | -0.62934700 | 3.01856400  |
| H                         | 3.96992700  | 1.08533600  | -0.37870300 | H                         | -1.01054200 | -1.35648200 | 3.43636200  |
| O                         | 2.99044000  | -1.47625200 | 0.29769400  | O                         | -0.53903700 | -2.75870100 | 1.00131700  |
| H                         | 3.91744900  | -1.22242500 | 0.40868300  | H                         | -1.25704300 | -2.99447300 | 1.60572900  |
| C                         | -0.91276100 | -3.53255500 | -0.07070200 | C                         | 2.69094500  | -2.57477000 | -1.84242500 |
| C                         | -2.08301200 | -2.80222000 | -0.03574400 | C                         | 3.36712200  | -1.42971000 | -2.22723400 |
| C                         | -2.04885400 | -1.38940800 | -0.01422500 | C                         | 3.11077600  | -0.21165400 | -1.55728800 |
| C                         | -0.80500300 | -0.71356200 | -0.03063000 | C                         | 2.16219000  | -0.25750400 | -0.51316400 |
| C                         | 0.32590400  | -2.86737300 | -0.08609200 | C                         | 1.76608300  | -2.51679500 | -0.78048800 |
| C                         | -3.27034400 | -0.63710000 | 0.02378700  | C                         | 3.73643200  | 1.04823800  | -1.85592700 |
| C                         | -0.78578500 | 0.73220400  | -0.00976400 | C                         | 1.82803800  | 0.93266800  | 0.21571800  |
| C                         | -2.01120700 | 1.44006000  | 0.02776500  | C                         | 2.46046900  | 2.15701400  | -0.08941600 |
| C                         | -3.25228300 | 0.71971400  | 0.04443700  | C                         | 3.42944600  | 2.17832800  | -1.15176800 |
| C                         | -2.00790300 | 2.85335200  | 0.04817300  | C                         | 2.07744000  | 3.27315100  | 0.68886800  |
| H                         | -2.96993800 | 3.38695500  | 0.07728000  | H                         | 2.52931300  | 4.24366000  | 0.49959600  |
| C                         | -0.81871000 | 3.55304400  | 0.03162800  | C                         | 1.13221700  | 3.11545500  | 1.68794000  |
| C                         | 0.40182300  | 2.85593800  | -0.00573900 | C                         | 0.55346600  | 1.84953500  | 1.90912000  |
| H                         | -4.21914000 | -1.19517300 | 0.03587800  | H                         | 4.46871900  | 1.08650600  | -2.65804400 |
| H                         | -0.93987100 | -4.63182300 | -0.08658000 | H                         | 2.86495700  | -3.51970700 | -2.34672800 |
| H                         | -3.05901900 | -3.31050500 | -0.02344400 | H                         | 4.08903300  | -1.45721600 | -3.03963200 |
| H                         | 1.25520700  | -3.45549700 | -0.11370300 | H                         | 1.18920900  | -3.36969400 | -0.43348400 |
| H                         | -4.18608000 | 1.30191100  | 0.07395200  | H                         | 3.91675100  | 3.11993500  | -1.39053300 |
| H                         | -0.81660800 | 4.65265400  | 0.04740000  | H                         | 0.82791000  | 3.95558800  | 2.30363800  |
| H                         | 1.34623700  | 3.41999700  | -0.01880500 | H                         | -0.18249800 | 1.64760100  | 2.68256200  |
| N                         | 0.37834100  | -1.48727000 | -0.06694100 | N                         | 1.52485100  | -1.38641400 | -0.12800500 |
| N                         | 0.41769100  | 1.47498300  | -0.02584400 | N                         | 0.88736300  | 0.79369500  | 1.17738600  |
|                           |             |             |             | C                         | -1.66040400 | -0.61489300 | -0.73856500 |
|                           |             |             |             | H                         | -1.69996300 | -1.69773000 | -0.58802800 |
|                           |             |             |             | O                         | -1.00010500 | -0.00664300 | 0.42748800  |
|                           |             |             |             | H                         | -1.63732900 | -0.00923600 | 1.17067700  |
|                           |             |             |             | H                         | -0.98617600 | -0.39522200 | -1.56918600 |
|                           |             |             |             | C                         | -3.02559400 | -0.02755700 | -0.94352900 |
|                           |             |             |             | C                         | -3.17285200 | 1.26067600  | -1.47955500 |
|                           |             |             |             | C                         | -4.16748300 | -0.74901400 | -0.57059500 |
|                           |             |             |             | C                         | -4.44033800 | 1.81566900  | -1.63905300 |
|                           |             |             |             | H                         | -2.29103700 | 1.82473100  | -1.77422100 |
|                           |             |             |             | C                         | -5.43786500 | -0.19443900 | -0.73240700 |
|                           |             |             |             | H                         | -4.06343300 | -1.75297200 | -0.16442500 |
|                           |             |             |             | C                         | -5.57424400 | 1.08804100  | -1.26545600 |

|  |   |             |             |             |
|--|---|-------------|-------------|-------------|
|  | H | -4.54720400 | 2.81114500  | -2.06000900 |
|  | H | -6.31759200 | -0.76400900 | -0.44784800 |
|  | H | -6.56245500 | 1.51962400  | -1.39525900 |

| TS <sub>1-2</sub>         |             |             |             | 2                         |             |             |             |
|---------------------------|-------------|-------------|-------------|---------------------------|-------------|-------------|-------------|
| Charge=0 Multiplicity = 2 |             |             |             | Charge=0 Multiplicity = 2 |             |             |             |
| Cu                        | 0.17658200  | -1.00122200 | -0.11143400 | Cu                        | 0.10881800  | -0.95565600 | -0.09048400 |
| O                         | -0.73337100 | -0.44173700 | 1.91487800  | O                         | -0.48603700 | -1.60003600 | 2.42347100  |
| H                         | -0.96764000 | -1.25117800 | 2.39396300  | H                         | -0.38029100 | -2.31730400 | 1.75695000  |
| O                         | -0.01337200 | -2.77316700 | -0.56029200 | O                         | -0.09935600 | -2.80870300 | -0.08189800 |
| H                         | -0.92729400 | -3.00819900 | -0.77087100 | H                         | -0.99218500 | -3.08613600 | -0.33176300 |
| C                         | 4.22118800  | -2.51345800 | 0.18160400  | C                         | 4.16917200  | -2.42332200 | -0.55956000 |
| C                         | 4.96609000  | -1.34768900 | 0.19842900  | C                         | 4.91094400  | -1.25916500 | -0.46915400 |
| C                         | 4.31154800  | -0.09924400 | 0.09198200  | C                         | 4.25003800  | -0.02458600 | -0.27349300 |
| C                         | 2.90448200  | -0.13303200 | -0.01960900 | C                         | 2.84214900  | -0.07148400 | -0.18976400 |
| C                         | 2.81805900  | -2.44213800 | 0.07097900  | C                         | 2.76405800  | -2.36474700 | -0.46497600 |
| C                         | 4.96791700  | 1.17924600  | 0.08711700  | C                         | 4.90084400  | 1.25104600  | -0.14803700 |
| C                         | 2.15492400  | 1.08448800  | -0.15049900 | C                         | 2.08843500  | 1.13027600  | 0.02818200  |
| C                         | 2.82374500  | 2.32794500  | -0.15319800 | C                         | 2.75010700  | 2.36992700  | 0.16052400  |
| C                         | 4.25571300  | 2.33901700  | -0.02637400 | C                         | 4.18387400  | 2.39525100  | 0.05901800  |
| C                         | 2.01664800  | 3.48067600  | -0.28548500 | C                         | 1.93231200  | 3.49946600  | 0.39317600  |
| H                         | 2.47839600  | 4.46478100  | -0.29159400 | H                         | 2.38697800  | 4.48060200  | 0.50424600  |
| C                         | 0.64661900  | 3.34011600  | -0.40469800 | C                         | 0.56121700  | 3.34096800  | 0.48352300  |
| C                         | 0.07499600  | 2.05202700  | -0.39690900 | C                         | -0.00410700 | 2.05833900  | 0.33632200  |
| H                         | 6.05049100  | 1.20782900  | 0.17744700  | H                         | 5.98466200  | 1.28956800  | -0.21628400 |
| H                         | 4.70197600  | -3.48344400 | 0.25432500  | H                         | 4.65384100  | -3.38361300 | -0.70143500 |
| H                         | 6.04893300  | -1.38161900 | 0.28866000  | H                         | 5.99532900  | -1.28424900 | -0.54115800 |
| H                         | 2.16997900  | -3.31339900 | 0.03693600  | H                         | 2.11771100  | -3.23655800 | -0.51701600 |
| H                         | 4.76786700  | 3.29751200  | -0.02625700 | H                         | 4.69374800  | 3.34987300  | 0.15665200  |
| H                         | 0.00209100  | 4.20730400  | -0.50357100 | H                         | -0.08789700 | 4.19047100  | 0.66823300  |
| H                         | -0.99410500 | 1.88202300  | -0.48125100 | H                         | -1.07066200 | 1.86237700  | 0.40050100  |
| N                         | 2.18733800  | -1.27871000 | -0.01514100 | N                         | 2.12572500  | -1.21426900 | -0.29187600 |
| N                         | 0.81323600  | 0.95525600  | -0.28195900 | N                         | 0.74552300  | 0.98667500  | 0.11115800  |
| C                         | -2.84753700 | -1.10564400 | -0.51023800 | C                         | -2.76702600 | -1.15220800 | -0.15665800 |
| H                         | -2.83359500 | -2.05538100 | 0.05741300  | H                         | -2.88235100 | -1.92081200 | 0.63181000  |
| O                         | -1.72650400 | -0.32073000 | -0.17427700 | O                         | -1.65283600 | -0.33912300 | 0.06130300  |
| H                         | -1.45149400 | -0.34973400 | 0.97564300  | H                         | -1.12611700 | -1.01562600 | 1.97416100  |
| H                         | -2.80901500 | -1.37817600 | -1.57447700 | H                         | -2.68038300 | -1.71252500 | -1.11039500 |
| C                         | -4.15308600 | -0.38502900 | -0.22219800 | C                         | -4.05392100 | -0.34341500 | -0.22001500 |
| C                         | -5.22966300 | -0.46317300 | -1.11177700 | C                         | -4.07976800 | 0.89439800  | -0.87539000 |
| C                         | -4.30989200 | 0.34902400  | 0.96211500  | C                         | -5.24210200 | -0.82705500 | 0.33817400  |
| C                         | -6.44172700 | 0.17031700  | -0.82785200 | C                         | -5.26277700 | 1.62618500  | -0.97468000 |
| H                         | -5.11761400 | -1.02246400 | -2.03872700 | H                         | -3.15696100 | 1.27541900  | -1.30314400 |
| C                         | -5.51770000 | 0.98552700  | 1.24663100  | C                         | -6.43064700 | -0.09988800 | 0.23936900  |

|   |             |            |             |   |             |             |             |
|---|-------------|------------|-------------|---|-------------|-------------|-------------|
| H | -3.47725800 | 0.42114400 | 1.65734600  | H | -5.23558600 | -1.78128000 | 0.86163500  |
| C | -6.58898700 | 0.89768300 | 0.35356000  | C | -6.44501500 | 1.13083300  | -0.41808700 |
| H | -7.26662800 | 0.10094900 | -1.53285700 | H | -5.26516200 | 2.58501500  | -1.48853000 |
| H | -5.62438800 | 1.55173800 | 2.16884400  | H | -7.34262700 | -0.49145100 | 0.68377200  |
| H | -7.52962500 | 1.39504900 | 0.57636300  | H | -7.36740700 | 1.70139100  | -0.49304100 |

| TS <sub>2-3'</sub>        |             |             |             | <sup>1</sup> 3            |             |             |             |
|---------------------------|-------------|-------------|-------------|---------------------------|-------------|-------------|-------------|
| Charge=0 Multiplicity = 2 |             |             |             | Charge=0 Multiplicity = 1 |             |             |             |
| Cu                        | -0.05535500 | -0.64217500 | -0.12856800 | Cu                        | -2.32787500 | -0.22905500 | -0.94313900 |
| O                         | -0.02193900 | 0.86391800  | 2.81563800  | O                         | -1.05576400 | -0.20452200 | -2.29838100 |
| H                         | -0.22139500 | 0.24837300  | 3.53620300  | H                         | -1.09026200 | 0.63295600  | -2.78404500 |
| O                         | -1.17528500 | -2.02205400 | -1.00757500 | C                         | -0.37679800 | -4.03727100 | -0.01718800 |
| H                         | -1.37495800 | -1.91671400 | -1.95381300 | C                         | -1.37709300 | -4.71218300 | 0.65282900  |
| C                         | 3.48437100  | -3.10356900 | -0.07581300 | C                         | -2.61887500 | -4.07083100 | 0.86514200  |
| C                         | 4.47624900  | -2.13717500 | -0.12776400 | C                         | -2.74810400 | -2.75959000 | 0.35805700  |
| C                         | 4.11139700  | -0.77499100 | -0.16261300 | C                         | -0.59299600 | -2.72191000 | -0.48386500 |
| C                         | 2.72878800  | -0.47607500 | -0.15313200 | C                         | -3.73321000 | -4.65900400 | 1.55618200  |
| C                         | 2.13828800  | -2.70969100 | -0.02899700 | C                         | -3.97979600 | -2.04408600 | 0.54407700  |
| C                         | 5.05090700  | 0.31234100  | -0.18793800 | C                         | -5.05827500 | -2.63659500 | 1.23855900  |
| C                         | 2.28743600  | 0.88735400  | -0.21445600 | C                         | -4.89993800 | -3.97349900 | 1.73906600  |
| C                         | 3.23148500  | 1.93970500  | -0.19666900 | C                         | -6.22225400 | -1.84911400 | 1.38934500  |
| C                         | 4.63001600  | 1.61007400  | -0.18471500 | H                         | -7.08280500 | -2.25699500 | 1.91387400  |
| C                         | 2.72433000  | 3.25622200  | -0.20225200 | C                         | -6.25143100 | -0.56580100 | 0.87329500  |
| H                         | 3.40983000  | 4.09942400  | -0.18636500 | C                         | -5.12461900 | -0.06486700 | 0.19253100  |
| C                         | 1.35367300  | 3.45358400  | -0.21937700 | H                         | -3.62685200 | -5.67024000 | 1.94027400  |
| C                         | 0.49646200  | 2.34220000  | -0.27118900 | H                         | 0.58821100  | -4.49987700 | -0.19705500 |
| H                         | 6.11223400  | 0.07865500  | -0.19126900 | H                         | -1.22353300 | -5.72438500 | 1.01946800  |
| H                         | 3.73226500  | -4.15962000 | -0.04656800 | H                         | 0.19919900  | -2.17636100 | -1.00874400 |
| H                         | 5.52671200  | -2.41570200 | -0.13661300 | H                         | -5.72996300 | -4.43246800 | 2.26957100  |
| H                         | 1.33706700  | -3.43863600 | 0.04079900  | H                         | -7.12997300 | 0.06126700  | 0.98429800  |
| H                         | 5.35317200  | 2.42138100  | -0.18244600 | H                         | -5.06698300 | 0.93768200  | -0.22200500 |
| H                         | 0.93150300  | 4.45307700  | -0.21079300 | N                         | -1.75560300 | -2.10150400 | -0.29361800 |
| H                         | -0.58311700 | 2.45413900  | -0.28996300 | N                         | -4.02963900 | -0.79621300 | 0.02492700  |
| N                         | 1.75998800  | -1.43002100 | -0.04345700 | C                         | -2.17015600 | 2.59531700  | -1.30709500 |
| N                         | 0.94532700  | 1.08984600  | -0.30171800 | H                         | -2.29245500 | 2.72541700  | -2.40322100 |
| C                         | -2.67301300 | -0.81265000 | 0.65011500  | O                         | -2.90816100 | 1.52090000  | -0.81819200 |
| H                         | -2.72567000 | -1.53333000 | 1.48512100  | H                         | -1.08758700 | 2.45575300  | -1.13328900 |
| O                         | -1.62064100 | 0.04531200  | 0.69681200  | C                         | -2.57278300 | 3.90843800  | -0.64859200 |
| H                         | -0.70868500 | 0.65547400  | 2.14257800  | C                         | -3.16692300 | 3.91934100  | 0.61797500  |
| H                         | -2.15236600 | -1.64888500 | -0.36522400 | C                         | -2.32123100 | 5.13452400  | -1.27752100 |
| C                         | -3.98710900 | -0.29243100 | 0.23504900  | C                         | -3.49803200 | 5.12359000  | 1.24199500  |
| C                         | -4.11915500 | 0.95277800  | -0.40943300 | H                         | -3.36492500 | 2.96576300  | 1.09670100  |
| C                         | -5.15414100 | -1.06069200 | 0.42633000  | C                         | -2.64711200 | 6.34114300  | -0.65706600 |

|   |             |             |             |    |             |             |             |
|---|-------------|-------------|-------------|----|-------------|-------------|-------------|
| C | -5.36236700 | 1.40746700  | -0.84297200 | H  | -1.86843600 | 5.14240500  | -2.26793900 |
| H | -3.22856600 | 1.55844600  | -0.54544000 | C  | -3.23912800 | 6.34068600  | 0.60834200  |
| C | -6.39493400 | -0.60609500 | -0.00961500 | H  | -3.96025200 | 5.11274700  | 2.22716400  |
| H | -5.07614300 | -2.02456600 | 0.92672100  | H  | -2.44667900 | 7.28226100  | -1.16463000 |
| C | -6.50965000 | 0.63271800  | -0.64981800 | H  | -3.49967000 | 7.27912200  | 1.09219200  |
| H | -5.44000100 | 2.37664000  | -1.33160600 | H  | 1.84538500  | 2.46349900  | 0.95339600  |
| H | -7.28006700 | -1.21683900 | 0.15437300  | C  | 2.88050600  | 2.21593900  | 1.17622600  |
| H | -7.47900500 | 0.98914800  | -0.98842700 | C  | 3.69714900  | 2.94722500  | 2.06292900  |
|   |             |             |             | N  | 3.33418400  | 1.14099100  | 0.54295400  |
|   |             |             |             | C  | 5.00333400  | 2.54551700  | 2.28528200  |
|   |             |             |             | H  | 3.29214800  | 3.82288800  | 2.55964300  |
|   |             |             |             | C  | 4.60229500  | 0.72992500  | 0.76782000  |
|   |             |             |             | C  | 5.50076300  | 1.39702500  | 1.62741700  |
|   |             |             |             | H  | 5.64879100  | 3.10279400  | 2.95973900  |
|   |             |             |             | C  | 5.01262700  | -0.45048100 | 0.06220300  |
|   |             |             |             | C  | 6.83162800  | 0.86921700  | 1.76384500  |
|   |             |             |             | C  | 6.32650400  | -0.94655300 | 0.20557800  |
|   |             |             |             | N  | 4.07230500  | -1.02949200 | -0.71896700 |
|   |             |             |             | C  | 7.22728500  | -0.24723400 | 1.08195600  |
|   |             |             |             | H  | 7.52775900  | 1.38104100  | 2.42322400  |
|   |             |             |             | C  | 6.64382700  | -2.10623000 | -0.53776200 |
|   |             |             |             | C  | 4.39322700  | -2.11119200 | -1.41821300 |
|   |             |             |             | H  | 8.23934700  | -0.62669800 | 1.19608300  |
|   |             |             |             | C  | 5.68030900  | -2.68137200 | -1.34928600 |
|   |             |             |             | H  | 7.64065000  | -2.53494000 | -0.46967900 |
|   |             |             |             | H  | 3.58904500  | -2.49982200 | -2.03797700 |
|   |             |             |             | H  | 5.90343200  | -3.56779000 | -1.93437800 |
|   |             |             |             | Cu | 2.26421500  | -0.04564500 | -0.73332400 |
|   |             |             |             | O  | 0.74254300  | 0.86935400  | -0.26971100 |
|   |             |             |             | O  | 1.65149200  | -1.21059500 | -2.02683100 |
|   |             |             |             | H  | 0.06323600  | 0.59624100  | -0.91392900 |
|   |             |             |             | H  | 0.78548900  | -0.88398200 | -2.34782900 |

|                |                  |             |             |                                |                  |             |             |
|----------------|------------------|-------------|-------------|--------------------------------|------------------|-------------|-------------|
| <sup>3</sup> 3 |                  |             |             | <sup>1</sup> TS <sub>3-4</sub> |                  |             |             |
| Charge=0       | Multiplicity = 3 |             |             | Charge=0                       | Multiplicity = 1 |             |             |
| Cu             | -2.32787500      | -0.22905500 | -0.94313900 | Cu                             | 2.32941300       | -0.45101200 | -1.11246700 |
| O              | -1.05576400      | -0.20452200 | -2.29838100 | O                              | 1.18849700       | 0.18891600  | -2.49199300 |
| H              | -1.09026200      | 0.63295600  | -2.78404500 | H                              | 1.31790500       | -0.30178800 | -3.31813800 |
| C              | -0.37679800      | -4.03727100 | -0.01718800 | C                              | 2.27312400       | 3.62368400  | 0.39577300  |
| C              | -1.37709300      | -4.71218300 | 0.65282900  | C                              | 3.57669900       | 3.77119700  | 0.84116000  |
| C              | -2.61887500      | -4.07083100 | 0.86514200  | C                              | 4.45789100       | 2.67306100  | 0.75607400  |
| C              | -2.74810400      | -2.75959000 | 0.35805700  | C                              | 3.94096900       | 1.47527800  | 0.20901300  |
| C              | -0.59299600      | -2.72191000 | -0.48386500 | C                              | 1.83215500       | 2.38240200  | -0.09606700 |
| C              | -3.73321000      | -4.65900400 | 1.55618200  | C                              | 5.82350900       | 2.69208700  | 1.20473900  |

|   |             |             |             |   |             |             |             |
|---|-------------|-------------|-------------|---|-------------|-------------|-------------|
| C | -3.97979600 | -2.04408600 | 0.54407700  | C | 4.79437600  | 0.33354600  | 0.05756000  |
| C | -5.05827500 | -2.63659500 | 1.23855900  | C | 6.12439900  | 0.36323100  | 0.54187300  |
| C | -4.89993800 | -3.97349900 | 1.73906600  | C | 6.61454000  | 1.58314100  | 1.12236200  |
| C | -6.22225400 | -1.84911400 | 1.38934500  | C | 6.88472300  | -0.81571200 | 0.39954700  |
| H | -7.08280500 | -2.25699500 | 1.91387400  | H | 7.91182800  | -0.84264100 | 0.75448100  |
| C | -6.25143100 | -0.56580100 | 0.87329500  | C | 6.30584800  | -1.92957800 | -0.19128600 |
| C | -5.12461900 | -0.06486700 | 0.19253100  | C | 4.98960400  | -1.85071400 | -0.67218500 |
| H | -3.62685200 | -5.67024000 | 1.94027400  | H | 6.21388900  | 3.61301800  | 1.63073200  |
| H | 0.58821100  | -4.49987700 | -0.19705500 | H | 1.57211200  | 4.45145600  | 0.43933400  |
| H | -1.22353300 | -5.72438500 | 1.01946800  | H | 3.92682800  | 4.71509000  | 1.25172600  |
| H | 0.19919900  | -2.17636100 | -1.00874400 | H | 0.80640200  | 2.23772100  | -0.44250100 |
| H | -5.72996300 | -4.43246800 | 2.26957100  | H | 7.63945900  | 1.61060000  | 1.48348100  |
| H | -7.12997300 | 0.06126700  | 0.98429800  | H | 6.86314200  | -2.85370800 | -0.30747300 |
| H | -5.06698300 | 0.93768200  | -0.22200500 | H | 4.49545600  | -2.69490600 | -1.14436600 |
| N | -1.75560300 | -2.10150400 | -0.29361800 | N | 2.63976800  | 1.31861500  | -0.16462200 |
| N | -4.02963900 | -0.79621300 | 0.02492700  | N | 4.25948000  | -0.73959500 | -0.58548400 |
| C | -2.17015600 | 2.59531700  | -1.30709500 | C | 0.69258600  | -2.74305100 | -0.71360100 |
| H | -2.29245500 | 2.72541700  | -2.40322100 | H | 0.37518700  | -3.57527000 | -1.37413100 |
| O | -2.90816100 | 1.52090000  | -0.81819200 | O | 1.92484200  | -2.30081100 | -0.96307500 |
| H | -1.08758700 | 2.45575300  | -1.13328900 | H | -0.17487200 | -1.88232800 | -1.02802300 |
| C | -2.57278300 | 3.90843800  | -0.64859200 | C | 0.32706500  | -3.01801100 | 0.72248300  |
| C | -3.16692300 | 3.91934100  | 0.61797500  | C | 1.17292200  | -2.64584600 | 1.77608000  |
| C | -2.32123100 | 5.13452400  | -1.27752100 | C | -0.89154000 | -3.64249700 | 1.03270200  |
| C | -3.49803200 | 5.12359000  | 1.24199500  | C | 0.81293600  | -2.89433400 | 3.10065700  |
| H | -3.36492500 | 2.96576300  | 1.09670100  | H | 2.12330600  | -2.17949500 | 1.53598000  |
| C | -2.64711200 | 6.34114300  | -0.65706600 | C | -1.25275700 | -3.89312400 | 2.35524700  |
| H | -1.86843600 | 5.14240500  | -2.26793900 | H | -1.55874600 | -3.93643300 | 0.22380500  |
| C | -3.23912800 | 6.34068600  | 0.60834200  | C | -0.40108900 | -3.51777700 | 3.39837000  |
| H | -3.96025200 | 5.11274700  | 2.22716400  | H | 1.48569500  | -2.60569800 | 3.90538500  |
| H | -2.44667900 | 7.28226100  | -1.16463000 | H | -2.19859600 | -4.38363400 | 2.57468700  |
| H | -3.49967000 | 7.27912200  | 1.09219200  | H | -0.68030400 | -3.71229300 | 4.43092500  |
| H | 1.84538500  | 2.46349900  | 0.95339600  | H | -3.04069000 | -2.14122000 | -2.09219600 |
| C | 2.88050600  | 2.21593900  | 1.17622600  | C | -3.87017700 | -1.75926000 | -1.50607200 |
| C | 3.69714900  | 2.94722500  | 2.06292900  | C | -5.05244500 | -2.48815900 | -1.30077900 |
| N | 3.33418400  | 1.14099100  | 0.54295400  | N | -3.69096600 | -0.53843900 | -1.00157900 |
| C | 5.00333400  | 2.54551700  | 2.28528200  | C | -6.08231300 | -1.93443000 | -0.55280200 |
| H | 3.29214800  | 3.82288800  | 2.55964300  | H | -5.15641900 | -3.46998700 | -1.75109500 |
| C | 4.60229500  | 0.72992500  | 0.76782000  | C | -4.67195000 | -0.01511600 | -0.21524600 |
| C | 5.50076300  | 1.39702500  | 1.62741700  | C | -5.90998600 | -0.65623200 | 0.01723400  |
| H | 5.64879100  | 3.10279400  | 2.95973900  | H | -7.01512300 | -2.47242700 | -0.40546800 |
| C | 5.01262700  | -0.45048100 | 0.06220300  | C | -4.40776600 | 1.27223000  | 0.34581000  |
| C | 6.83162800  | 0.86921700  | 1.76384500  | C | -6.90212300 | 0.04238700  | 0.78961300  |
| C | 6.32650400  | -0.94655300 | 0.20557800  | C | -5.40863600 | 1.95688800  | 1.07147900  |
| N | 4.07230500  | -1.02949200 | -0.71896700 | N | -3.15389100 | 1.76028300  | 0.15257100  |

|    |            |             |             |    |             |             |             |
|----|------------|-------------|-------------|----|-------------|-------------|-------------|
| C  | 7.22728500 | -0.24723400 | 1.08195600  | C  | -6.67011700 | 1.29699700  | 1.27653200  |
| H  | 7.52775900 | 1.38104100  | 2.42322400  | H  | -7.85722400 | -0.44511200 | 0.96676000  |
| C  | 6.64382700 | -2.10623000 | -0.53776200 | C  | -5.07702700 | 3.24056200  | 1.55332800  |
| C  | 4.39322700 | -2.11119200 | -1.41821300 | C  | -2.87813500 | 2.98781800  | 0.58699100  |
| H  | 8.23934700 | -0.62669800 | 1.19608300  | H  | -7.44012200 | 1.81506200  | 1.84225100  |
| C  | 5.68030900 | -2.68137200 | -1.34928600 | C  | -3.81599500 | 3.75947700  | 1.29268900  |
| H  | 7.64065000 | -2.53494000 | -0.46967900 | H  | -5.80781200 | 3.81166200  | 2.12002000  |
| H  | 3.58904500 | -2.49982200 | -2.03797700 | H  | -1.87785700 | 3.34276400  | 0.35930000  |
| H  | 5.90343200 | -3.56779000 | -1.93437800 | H  | -3.53659000 | 4.74653500  | 1.64683000  |
| Cu | 2.26421500 | -0.04564500 | -0.73332400 | Cu | -2.05757100 | 0.58521500  | -1.06880000 |
| O  | 0.74254300 | 0.86935400  | -0.26971100 | O  | -0.95704500 | -0.85541400 | -1.48541400 |
| O  | 1.65149200 | -1.21059500 | -2.02683100 | O  | -0.93824700 | 1.92479100  | -1.60130000 |
| H  | 0.06323600 | 0.59624100  | -0.91392900 | H  | -0.16783700 | -0.44671000 | -1.97538400 |
| H  | 0.78548900 | -0.88398200 | -2.34782900 | H  | -0.21527500 | 1.54109800  | -2.13779300 |

| <sup>3</sup> TS <sub>3-4</sub> |             |             |             | 4u                        |             |             |             |
|--------------------------------|-------------|-------------|-------------|---------------------------|-------------|-------------|-------------|
| Charge=0 Multiplicity = 3      |             |             |             | Charge=0 Multiplicity = 1 |             |             |             |
| Cu                             | -2.25725300 | -0.05512500 | -1.23058000 | Cu                        | -2.46844300 | 0.58536200  | -0.58054800 |
| O                              | -1.28324800 | -0.93382300 | -2.57578600 | O                         | -1.20903600 | 0.53476300  | -2.04565400 |
| H                              | -1.38358100 | -0.44557500 | -3.40804800 | H                         | -1.43001600 | -0.13987400 | -2.70358900 |
| C                              | -1.78376000 | -3.85183900 | 0.93568400  | C                         | -2.53068000 | -3.03859200 | 1.78775600  |
| C                              | -2.98618800 | -3.94224000 | 1.60875400  | C                         | -3.87712400 | -3.35069700 | 1.79432600  |
| C                              | -3.92576500 | -2.89376000 | 1.48616600  | C                         | -4.77902600 | -2.50288200 | 1.11715100  |
| C                              | -3.56271800 | -1.80933900 | 0.65664400  | C                         | -4.24129200 | -1.36555800 | 0.46689000  |
| C                              | -1.50228000 | -2.72400100 | 0.13521100  | C                         | -2.07886500 | -1.88751500 | 1.11836400  |
| C                              | -5.19963000 | -2.86182800 | 2.15079300  | C                         | -6.19611400 | -2.73086000 | 1.06857100  |
| C                              | -4.46717900 | -0.70363500 | 0.49765400  | C                         | -5.12014300 | -0.46663500 | -0.23266600 |
| C                              | -5.70571400 | -0.68343400 | 1.17825000  | C                         | -6.51735400 | -0.70789100 | -0.24834400 |
| C                              | -6.05016200 | -1.80314900 | 2.00934400  | C                         | -7.03073900 | -1.86990500 | 0.41990200  |
| C                              | -6.51592200 | 0.45836400  | 0.98461600  | C                         | -7.32704600 | 0.22594900  | -0.92857700 |
| H                              | -7.48056900 | 0.52337000  | 1.48188200  | H                         | -8.40363600 | 0.07991200  | -0.96506500 |
| C                              | -6.06803900 | 1.48508700  | 0.17166900  | C                         | -6.73504600 | 1.31831300  | -1.53791000 |
| C                              | -4.81864100 | 1.36873300  | -0.46764400 | C                         | -5.33864200 | 1.46097100  | -1.47822200 |
| H                              | -5.47294700 | -3.70284200 | 2.78285400  | H                         | -6.59417700 | -3.60858600 | 1.57145900  |
| H                              | -1.03891600 | -4.63750700 | 1.01110700  | H                         | -1.80696500 | -3.66876400 | 2.29523400  |
| H                              | -3.21722400 | -4.80285800 | 2.23203600  | H                         | -4.24918400 | -4.23333200 | 2.30871200  |
| H                              | -0.54708600 | -2.62597700 | -0.39473800 | H                         | -1.01824600 | -1.62684300 | 1.05818300  |
| H                              | -7.00560000 | -1.79266400 | 2.52720400  | H                         | -8.10240400 | -2.05034800 | 0.39832400  |
| H                              | -6.66587100 | 2.37761400  | 0.01839900  | H                         | -7.32930100 | 2.05712700  | -2.06649000 |
| H                              | -4.38967100 | 2.14294800  | -1.09855400 | H                         | -4.84314700 | 2.30288400  | -1.95445500 |
| N                              | -2.37400600 | -1.72507300 | 0.00482300  | N                         | -2.91143400 | -1.05841900 | 0.47506700  |
| N                              | -4.05699000 | 0.29174500  | -0.32053900 | N                         | -4.54294600 | 0.59514600  | -0.85521600 |
| C                              | -0.90146600 | 2.39487600  | -1.79055100 | C                         | -1.70390300 | 3.38938600  | 0.46762500  |

|    |             |             |             |    |             |             |             |
|----|-------------|-------------|-------------|----|-------------|-------------|-------------|
| H  | -0.84425300 | 2.84444300  | -2.80050900 | H  | -2.12249400 | 4.40257100  | 0.32226500  |
| O  | -2.12486600 | 1.75456000  | -1.58012100 | O  | -2.37350900 | 2.42563400  | 0.07754100  |
| H  | 0.03115500  | 1.56386800  | -1.72090600 | H  | 1.54326800  | 1.63007200  | -2.44266600 |
| C  | -0.58071300 | 3.43198100  | -0.76313000 | C  | -0.40995000 | 3.33655300  | 1.13721700  |
| C  | -1.17129100 | 3.41251100  | 0.51461900  | C  | 0.28206500  | 2.12574800  | 1.33371000  |
| C  | 0.40641400  | 4.40931100  | -1.00583300 | C  | 0.14479700  | 4.54337500  | 1.60634400  |
| C  | -0.78949700 | 4.32026900  | 1.50363900  | C  | 1.50517600  | 2.13757400  | 1.99895200  |
| H  | -1.94514100 | 2.67519600  | 0.70437100  | H  | -0.09743400 | 1.18164700  | 0.94773300  |
| C  | 0.78659200  | 5.31920500  | -0.02103800 | C  | 1.36598600  | 4.54485100  | 2.27103900  |
| H  | 0.87359100  | 4.45191800  | -1.98845600 | H  | -0.39385100 | 5.47562500  | 1.44791400  |
| C  | 0.19310600  | 5.28130700  | 1.24738000  | C  | 2.04734100  | 3.33864300  | 2.46876400  |
| H  | -1.26886600 | 4.28479100  | 2.48062000  | H  | 2.04119800  | 1.20359900  | 2.13605400  |
| H  | 1.54166900  | 6.07062300  | -0.24520900 | H  | 1.78899100  | 5.47784300  | 2.63338000  |
| H  | 0.47791200  | 5.99981900  | 2.01257100  | H  | 3.00436200  | 3.33592200  | 2.98385000  |
| H  | 1.39851200  | 2.05063400  | 0.37155500  | H  | 3.31682400  | 2.64359700  | -0.92475500 |
| C  | 2.39496300  | 1.78249100  | 0.70438800  | C  | 4.14567700  | 1.95806600  | -0.76574000 |
| C  | 3.16352200  | 2.65256400  | 1.50300400  | C  | 5.45048000  | 2.42783700  | -0.73172700 |
| N  | 2.84620200  | 0.59343700  | 0.31671500  | N  | 3.80543400  | 0.66806400  | -0.55093600 |
| C  | 4.42994000  | 2.27010100  | 1.90750900  | C  | 6.50329200  | 1.53854800  | -0.44866700 |
| H  | 2.73724900  | 3.60925400  | 1.78420900  | H  | 5.64127200  | 3.48488200  | -0.88885800 |
| C  | 4.09789400  | 0.22173400  | 0.69146900  | C  | 4.84627600  | -0.22230500 | -0.34312000 |
| C  | 4.93845800  | 1.01483900  | 1.50202800  | C  | 6.20518900  | 0.18574000  | -0.24330700 |
| H  | 5.03726700  | 2.92250900  | 2.52996100  | H  | 7.52967800  | 1.88900700  | -0.38336900 |
| C  | 4.54390600  | -1.06090300 | 0.23152300  | C  | 4.49478000  | -1.57988300 | -0.18300400 |
| C  | 6.23226000  | 0.49811600  | 1.85731400  | C  | 7.18459600  | -0.82182200 | 0.07752600  |
| C  | 5.81462100  | -1.55428900 | 0.60169200  | C  | 5.46954800  | -2.55766800 | 0.16769900  |
| N  | 3.68704200  | -1.73569700 | -0.57178100 | N  | 3.17388900  | -1.89832600 | -0.40119000 |
| C  | 6.64959300  | -0.73174100 | 1.43343900  | C  | 6.83413200  | -2.12275400 | 0.29167900  |
| H  | 6.87913400  | 1.10923700  | 2.48133200  | H  | 8.22498700  | -0.51587500 | 0.16012700  |
| C  | 6.16215800  | -2.83315500 | 0.11138700  | C  | 5.03029500  | -3.87372900 | 0.35175300  |
| C  | 4.02573300  | -2.94289200 | -1.00873800 | C  | 2.78448700  | -3.15708100 | -0.17174400 |
| H  | 7.62954600  | -1.10574900 | 1.71799400  | H  | 7.59164400  | -2.85953700 | 0.54885200  |
| C  | 5.26544900  | -3.52704500 | -0.68463600 | C  | 3.66999900  | -4.17124800 | 0.19723700  |
| H  | 7.12879000  | -3.26228500 | 0.36319600  | H  | 5.74333800  | -4.65156500 | 0.61388100  |
| H  | 3.27233900  | -3.43088200 | -1.62099800 | H  | 1.72270200  | -3.34076500 | -0.30732600 |
| H  | 5.50797300  | -4.51279900 | -1.06815300 | H  | 3.30069000  | -5.18256300 | 0.33413200  |
| Cu | 1.94952100  | -0.74168600 | -0.93112700 | Cu | 2.07750800  | -0.27827900 | -0.74128200 |
| O  | 0.80821000  | 0.53290400  | -1.69171600 | O  | 1.26318800  | 0.72029500  | -2.26895600 |
| O  | 1.09770100  | -2.28767200 | -1.46882400 | O  | 0.46552900  | -0.82502400 | 0.02791400  |
| H  | 0.14533100  | -0.04042100 | -2.15548500 | H  | 0.20219900  | 0.71137900  | -2.19111400 |
| H  | 0.37150200  | -2.04721500 | -2.07731300 | H  | -0.23630700 | -0.52118900 | -0.57701900 |



| 4r                        |             |             |             | <sup>3</sup> 4            |             |             |             |
|---------------------------|-------------|-------------|-------------|---------------------------|-------------|-------------|-------------|
| Charge=0 Multiplicity = 1 |             |             |             | Charge=0 Multiplicity = 3 |             |             |             |
| Cu                        | -2.46824300 | 0.58445000  | -0.58136400 | Cu                        | 2.39877300  | -0.66590000 | -0.65687200 |
| O                         | -1.20932500 | 0.53027300  | -2.04675100 | O                         | 1.26992800  | -0.66583900 | -2.23084700 |
| H                         | -1.43260000 | -0.14388500 | -2.70440700 | H                         | 1.58566000  | -0.11033700 | -2.95716100 |
| C                         | -2.53180900 | -3.04132600 | 1.78375000  | C                         | 2.65221900  | 3.30475100  | 1.06354200  |
| C                         | -3.87840900 | -3.35282700 | 1.79021700  | C                         | 4.01955900  | 3.49223600  | 1.13969200  |
| C                         | -4.78010800 | -2.50356700 | 1.11460400  | C                         | 4.87648200  | 2.45730700  | 0.70960700  |
| C                         | -4.24199700 | -1.36561800 | 0.46574500  | C                         | 4.27461300  | 1.27188600  | 0.22105200  |
| C                         | -2.07964800 | -1.88943000 | 1.11603000  | C                         | 2.13698400  | 2.09201400  | 0.57406500  |
| C                         | -6.19736000 | -2.73061500 | 1.06632200  | C                         | 6.30914200  | 2.54640200  | 0.75578600  |
| C                         | -5.12057500 | -0.46521800 | -0.23225600 | C                         | 5.10668700  | 0.18963600  | -0.23399400 |
| C                         | -6.51796500 | -0.70550000 | -0.24747700 | C                         | 6.51844200  | 0.29851300  | -0.15685000 |
| C                         | -7.03175200 | -1.86815600 | 0.41935900  | C                         | 7.09687500  | 1.51101200  | 0.34871400  |
| C                         | -7.32741600 | 0.22984400  | -0.92591000 | C                         | 7.27732300  | -0.80867800 | -0.59107200 |
| H                         | -8.40412600 | 0.08459400  | -0.96198900 | H                         | 8.36276500  | -0.76786400 | -0.54863700 |
| C                         | -6.73501600 | 1.32267900  | -1.53403400 | C                         | 6.62435800  | -1.93341200 | -1.06385700 |
| C                         | -5.33848200 | 1.46422300  | -1.47507400 | C                         | 5.22057300  | -1.93675000 | -1.11791200 |
| H                         | -6.59573300 | -3.60884000 | 1.56809400  | H                         | 6.75629900  | 3.46224400  | 1.13387400  |
| H                         | -1.80827600 | -3.67254600 | 2.29018900  | H                         | 1.96154700  | 4.07952700  | 1.38131200  |
| H                         | -4.25073200 | -4.23603100 | 2.30343500  | H                         | 4.44151600  | 4.41812100  | 1.52246300  |
| H                         | -1.01896900 | -1.62885800 | 1.05639400  | H                         | 1.06312100  | 1.91810300  | 0.47683600  |
| H                         | -8.10354600 | -2.04786700 | 0.39806800  | H                         | 8.17994200  | 1.58843800  | 0.39786000  |
| H                         | -7.32907600 | 2.06267400  | -2.06117900 | H                         | 7.17793500  | -2.80331400 | -1.40317600 |
| H                         | -4.84266000 | 2.30640500  | -1.95049100 | H                         | 4.67896100  | -2.80014000 | -1.49495600 |
| N                         | -2.91201700 | -1.05908000 | 0.47407000  | N                         | 2.92302800  | 1.08680500  | 0.16703300  |
| N                         | -4.54298000 | 0.59692800  | -0.85384300 | N                         | 4.47294400  | -0.90760200 | -0.72635800 |
| C                         | -1.70145500 | 3.38881200  | 0.46680700  | C                         | 1.42580300  | -3.02382700 | 1.09038100  |
| H                         | -2.12020800 | 4.40185800  | 0.32082700  | H                         | 1.71180400  | -4.07616700 | 1.27123800  |
| O                         | -2.37033700 | 2.42474000  | 0.07638600  | O                         | 2.11545200  | -2.36342100 | 0.30360000  |
| H                         | 1.54174500  | 1.62781600  | -2.44598500 | H                         | -1.48366600 | -1.68023000 | -2.69330700 |
| C                         | -0.40801800 | 3.33651500  | 1.13747800  | C                         | 0.26678200  | -2.54450800 | 1.83102200  |
| C                         | 0.28419100  | 2.12591700  | 1.33470200  | C                         | -0.23619900 | -1.24481400 | 1.63870300  |
| C                         | 0.14603500  | 4.54361600  | 1.60668600  | C                         | -0.35516300 | -3.40660900 | 2.75435900  |
| C                         | 1.50691700  | 2.13833000  | 2.00067200  | C                         | -1.34478200 | -0.82061900 | 2.36467600  |
| H                         | -0.09483800 | 1.18154700  | 0.94879400  | H                         | 0.20561600  | -0.57529400 | 0.90635000  |
| C                         | 1.36680700  | 4.54562900  | 2.27214800  | C                         | -1.45808800 | -2.97307900 | 3.48180900  |
| H                         | -0.39279500 | 5.47566400  | 1.44767400  | H                         | 0.03462400  | -4.41277900 | 2.89521500  |
| C                         | 2.04841800  | 3.33967900  | 2.47052800  | C                         | -1.95366100 | -1.67852300 | 3.28681000  |
| H                         | 2.04318900  | 1.20458100  | 2.13837100  | H                         | -1.73540900 | 0.17783100  | 2.19265900  |
| H                         | 1.78929900  | 5.47882900  | 2.63455400  | H                         | -1.93677800 | -3.63866700 | 4.19469500  |
| H                         | 3.00513300  | 3.33738000  | 2.98618900  | H                         | -2.82137000 | -1.34245500 | 3.84820400  |
| H                         | 3.31642000  | 2.64295700  | -0.92791200 | H                         | -3.10682000 | -2.72258900 | -1.58207000 |
| C                         | 4.14530200  | 1.95762900  | -0.76819900 | C                         | -3.96156700 | -2.13789800 | -1.24806100 |

|    |             |             |             |    |             |             |             |
|----|-------------|-------------|-------------|----|-------------|-------------|-------------|
| C  | 5.45010200  | 2.42737500  | -0.73486600 | C  | -5.20613800 | -2.73034100 | -1.12765000 |
| N  | 3.80503200  | 0.66784800  | -0.55181300 | N  | -3.71164400 | -0.84155200 | -0.96145000 |
| C  | 6.50294500  | 1.53840400  | -0.45082800 | C  | -6.30464400 | -1.95692600 | -0.68108300 |
| H  | 5.64091700  | 3.48422500  | -0.89328500 | H  | -5.32708000 | -3.77891000 | -1.37925200 |
| C  | 4.84590100  | -0.22230100 | -0.34312500 | C  | -4.78352600 | -0.08081900 | -0.50641500 |
| C  | 6.20481800  | 0.18583500  | -0.24387800 | C  | -6.09816500 | -0.61536000 | -0.36035100 |
| H  | 7.52933900  | 1.88892200  | -0.38602300 | H  | -7.29321100 | -2.39737600 | -0.58390400 |
| C  | 4.49443400  | -1.57972200 | -0.18158800 | C  | -4.51306100 | 1.25365600  | -0.17806800 |
| C  | 7.18424600  | -0.82139100 | 0.07796200  | C  | -7.12433700 | 0.28189000  | 0.11423900  |
| C  | 5.46926500  | -2.55717200 | 0.16990500  | C  | -5.53580800 | 2.13204500  | 0.29434800  |
| N  | 3.17352700  | -1.89840300 | -0.39926500 | N  | -3.20626200 | 1.67295400  | -0.34061500 |
| C  | 6.83383400  | -2.12212800 | 0.29341900  | C  | -6.85995800 | 1.58386200  | 0.42365100  |
| H  | 8.22463300  | -0.51533200 | 0.16020400  | H  | -8.13319600 | -0.10974800 | 0.22427000  |
| C  | 5.03005900  | -3.87311000 | 0.35501000  | C  | -5.17416200 | 3.44381000  | 0.60228700  |
| C  | 2.78421000  | -3.15695900 | -0.16893000 | C  | -2.89517400 | 2.93589000  | -0.02649900 |
| H  | 7.59137700  | -2.85864200 | 0.55127200  | H  | -7.65641400 | 2.23376500  | 0.77945600  |
| C  | 3.66981200  | -4.17084900 | 0.20073600  | C  | -3.83598500 | 3.85177700  | 0.44147400  |
| H  | 5.74315600  | -4.65069700 | 0.61774400  | H  | -5.92520600 | 4.14122300  | 0.96582700  |
| H  | 1.72240800  | -3.34076100 | -0.30422900 | H  | -1.84880100 | 3.19245900  | -0.16222400 |
| H  | 3.30057200  | -5.18209200 | 0.33834100  | H  | -3.52844800 | 4.86493000  | 0.67822400  |
| Cu | 2.07729300  | -0.27837400 | -0.74115300 | Cu | -2.04967500 | 0.24137800  | -1.04037000 |
| O  | 1.26283200  | 0.71809900  | -2.27022100 | O  | -1.16928100 | -0.79353000 | -2.46931900 |
| O  | 0.46540800  | -0.82500300 | 0.02831200  | O  | -0.46481000 | 1.06705700  | -0.52881600 |
| H  | 0.20178400  | 0.70710700  | -2.19524100 | H  | -0.08490400 | -0.80437300 | -2.39543100 |
| H  | -0.23612700 | -0.52270700 | -0.57776200 | H  | 0.24835400  | 0.69922400  | -1.08200100 |

| <sup>15</sup>             |            |             |             | <sup>35</sup>             |            |             |             |
|---------------------------|------------|-------------|-------------|---------------------------|------------|-------------|-------------|
| Charge=0 Multiplicity = 1 |            |             |             | Charge=0 Multiplicity = 3 |            |             |             |
| Cu                        | 2.03164800 | -0.15951600 | 0.24044500  | Cu                        | 2.14547500 | 0.03649300  | -0.08561500 |
| O                         | 1.03098700 | -1.60836400 | 0.86136600  | O                         | 0.97727400 | 1.43217100  | -0.54650900 |
| H                         | 0.42063500 | -1.85895700 | 0.12800700  | H                         | 0.38859500 | 1.57932800  | 0.22544800  |
| C                         | 4.42413000 | 3.37835100  | -0.69051800 | C                         | 4.77246500 | -2.97223800 | 1.65786400  |
| C                         | 5.69145600 | 2.84242700  | -0.80974000 | C                         | 6.02623600 | -2.44785100 | 1.40235500  |
| C                         | 5.88198300 | 1.46052700  | -0.58448300 | C                         | 6.13508000 | -1.18862800 | 0.76963500  |
| C                         | 4.73274800 | 0.70596800  | -0.26154500 | C                         | 4.92562100 | -0.54575600 | 0.42874500  |
| C                         | 3.33684900 | 2.54470400  | -0.35799000 | C                         | 3.62515600 | -2.24825200 | 1.27795200  |
| C                         | 7.15108700 | 0.78950000  | -0.65319400 | C                         | 7.37393000 | -0.52808400 | 0.45968000  |
| C                         | 4.85315700 | -0.69800500 | 0.00636800  | C                         | 4.94744100 | 0.74249500  | -0.20254700 |
| C                         | 6.11222500 | -1.33454700 | -0.05230900 | C                         | 6.17531100 | 1.37567100  | -0.49140000 |
| C                         | 7.26283100 | -0.54742600 | -0.39873900 | C                         | 7.39343100 | 0.69784200  | -0.14254800 |
| C                         | 6.13574300 | -2.71584400 | 0.24835200  | C                         | 6.09882800 | 2.64527000  | -1.10930400 |
| H                         | 7.07795700 | -3.25727800 | 0.21789700  | H                         | 7.01231400 | 3.18012000  | -1.35681800 |
| C                         | 4.95944400 | -3.36114400 | 0.58385500  | C                         | 4.85962200 | 3.19236900  | -1.39162500 |
| C                         | 3.75085700 | -2.63656000 | 0.61296500  | C                         | 3.68950900 | 2.47874600  | -1.06130100 |

|    |             |             |             |    |             |             |             |
|----|-------------|-------------|-------------|----|-------------|-------------|-------------|
| H  | 8.03108900  | 1.37351700  | -0.90900700 | H  | 8.30460500  | -1.02608400 | 0.71782700  |
| H  | 4.24806400  | 4.43750600  | -0.84672000 | H  | 4.65394600  | -3.93387600 | 2.14563000  |
| H  | 6.54166500  | 3.46949500  | -1.06624400 | H  | 6.92596900  | -2.98901700 | 1.68369000  |
| H  | 2.32106600  | 2.92178500  | -0.23368800 | H  | 2.62140000  | -2.61383000 | 1.46668200  |
| H  | 8.23175300  | -1.03662000 | -0.45024000 | H  | 8.34009900  | 1.18144200  | -0.36833700 |
| H  | 4.95240600  | -4.41909500 | 0.82478900  | H  | 4.77472300  | 4.16563600  | -1.86380300 |
| H  | 2.78686200  | -3.06751300 | 0.87019700  | H  | 2.68278100  | 2.84431100  | -1.24663300 |
| N  | 3.48874600  | 1.23889700  | -0.15928600 | N  | 3.70013900  | -1.06731800 | 0.67826500  |
| N  | 3.70845100  | -1.34152900 | 0.32795800  | N  | 3.74117300  | 1.28621000  | -0.48210200 |
| H  | -1.89653500 | 2.50243800  | 0.61955300  | H  | -2.42395000 | -2.63540200 | -1.07831400 |
| C  | -2.96443600 | 2.32632200  | 0.51100600  | C  | -3.45449600 | -2.32568600 | -0.92733000 |
| C  | -3.88537600 | 3.37268600  | 0.60871600  | C  | -4.50965000 | -3.18123000 | -1.24356100 |
| N  | -3.31981600 | 1.06390200  | 0.22805900  | N  | -3.62831400 | -1.10384300 | -0.39592700 |
| C  | -5.23925500 | 3.12264100  | 0.38816200  | C  | -5.82401000 | -2.77855700 | -0.99677100 |
| H  | -3.52980300 | 4.37575300  | 0.82199600  | H  | -4.29226900 | -4.16456500 | -1.64828200 |
| C  | -4.65752500 | 0.80043500  | 0.06309700  | C  | -4.92417900 | -0.67605700 | -0.21796500 |
| C  | -5.65336600 | 1.81283800  | 0.09905400  | C  | -6.05403600 | -1.49817100 | -0.46854000 |
| H  | -5.97037800 | 3.92609900  | 0.42824500  | H  | -6.66093400 | -3.43917900 | -1.20686800 |
| C  | -5.01295800 | -0.55177400 | -0.19570100 | C  | -5.09428800 | 0.64574200  | 0.27634200  |
| C  | -7.01188500 | 1.43923300  | -0.18660300 | C  | -7.35599300 | -0.97653200 | -0.14935900 |
| C  | -6.35394600 | -0.89207200 | -0.51522100 | C  | -6.38470900 | 1.13103500  | 0.61499800  |
| N  | -4.00568900 | -1.48481700 | -0.09509100 | N  | -3.95721100 | 1.41355400  | 0.37032800  |
| C  | -7.34180000 | 0.15394300  | -0.50039700 | C  | -7.51240100 | 0.26781300  | 0.38676400  |
| H  | -7.77567800 | 2.21288400  | -0.16559400 | H  | -8.22238800 | -1.60752600 | -0.33246900 |
| C  | -6.63604600 | -2.23538000 | -0.81177600 | C  | -6.47551100 | 2.43304200  | 1.13225600  |
| C  | -4.31623500 | -2.75593500 | -0.40768400 | C  | -4.08357300 | 2.64531900  | 0.89492000  |
| H  | -8.37110900 | -0.10707000 | -0.73436300 | H  | -8.50402400 | 0.63661200  | 0.63735000  |
| C  | -5.59650600 | -3.16785300 | -0.77226800 | C  | -5.30714200 | 3.18538300  | 1.28601500  |
| H  | -7.64966600 | -2.53667400 | -1.06197700 | H  | -7.44428300 | 2.84464400  | 1.40277400  |
| H  | -3.50139300 | -3.47077100 | -0.32911200 | H  | -3.16272900 | 3.21575400  | 0.97560800  |
| H  | -5.77906400 | -4.21623800 | -0.98710600 | H  | -5.34445700 | 4.19853400  | 1.67429800  |
| Cu | -2.24994500 | -0.61702700 | 0.19890400  | Cu | -2.34192500 | 0.36974700  | -0.03708300 |
| O  | -1.05164600 | -0.39413300 | 1.79437800  | O  | -1.03811500 | 0.12764700  | -1.53131400 |
| O  | -0.96523100 | -1.44682700 | -0.97565900 | O  | -1.04136500 | 0.94276600  | 1.26179600  |
| H  | -0.25302400 | -0.99911400 | 1.61061200  | H  | -0.26682900 | 0.75839400  | -1.33532700 |
| O  | 0.47490300  | 2.28355000  | 0.32907500  | O  | 0.44788600  | -2.13484800 | -1.11920000 |
| O  | 0.98331200  | 1.38570600  | 1.19113100  | O  | 1.68586400  | -1.66321400 | -1.17833400 |
| H  | -0.58351400 | 0.46817500  | 1.74960300  | H  | -0.59889900 | -0.75396000 | -1.40860600 |
| O  | 0.89450500  | 0.23788700  | -1.51332000 | O  | 0.79327500  | -0.83009400 | 1.35453800  |
| H  | 0.13197700  | -0.44807800 | -1.44815100 | H  | 0.08757900  | -0.07554700 | 1.38729700  |
| H  | 0.47755200  | 1.07263500  | -1.21658600 | H  | 0.39299300  | -1.47399300 | 0.73345200  |
| H  | -1.35579600 | -1.93906800 | -1.71091400 | H  | -1.41211200 | 1.18947300  | 2.12019800  |

<sup>1</sup>TS5-6

<sup>3</sup>TS5-6

| Charge=0 Multiplicity = 1 |             |             |             | Charge=0 Multiplicity = 3 |             |             |             |
|---------------------------|-------------|-------------|-------------|---------------------------|-------------|-------------|-------------|
| Cu                        | -1.95636500 | -0.62158600 | -0.02375600 | Cu                        | -2.02311800 | -0.16853600 | -0.17471500 |
| O                         | -1.27010700 | -2.15947600 | -0.81197800 | O                         | -1.00862400 | -1.63098000 | -0.79825800 |
| H                         | -0.57901700 | -2.52272400 | -0.22969400 | H                         | -0.40705600 | -1.86629400 | -0.05314100 |
| C                         | -3.38629900 | 3.17575400  | 1.54792600  | C                         | -4.40383600 | 3.35874500  | 0.89410000  |
| C                         | -4.75531200 | 3.06286200  | 1.38207200  | C                         | -5.68602700 | 2.84342200  | 0.90433800  |
| C                         | -5.29037900 | 1.89596200  | 0.79124300  | C                         | -5.88751200 | 1.48310300  | 0.58192700  |
| C                         | -4.36273700 | 0.90032600  | 0.41488400  | C                         | -4.73638200 | 0.72508000  | 0.26984500  |
| C                         | -2.54051100 | 2.12560900  | 1.13601700  | C                         | -3.32000600 | 2.52241500  | 0.56306400  |
| C                         | -6.68704500 | 1.65674600  | 0.54692100  | C                         | -7.17013400 | 0.83540000  | 0.54948100  |
| C                         | -4.81535900 | -0.30907300 | -0.21269100 | C                         | -4.86517500 | -0.66450900 | -0.06536200 |
| C                         | -6.19119100 | -0.51998900 | -0.44785500 | C                         | -6.13686200 | -1.27770900 | -0.10029700 |
| C                         | -7.11783400 | 0.50223500  | -0.04315900 | C                         | -7.29063200 | -0.48428100 | 0.22093500  |
| C                         | -6.54259200 | -1.73595900 | -1.07754300 | C                         | -6.16934200 | -2.64526800 | -0.45680600 |
| H                         | -7.58756400 | -1.95364300 | -1.28439600 | H                         | -7.12157700 | -3.16795600 | -0.49980800 |
| C                         | -5.54986000 | -2.63545600 | -1.42576400 | C                         | -4.98731000 | -3.30101700 | -0.75052500 |
| C                         | -4.20205000 | -2.33152200 | -1.14664500 | C                         | -3.76602800 | -2.60120800 | -0.68160300 |
| H                         | -7.40278900 | 2.41986100  | 0.84147200  | H                         | -8.05189000 | 1.42274800  | 0.79113500  |
| H                         | -2.95085100 | 4.06488600  | 1.99223100  | H                         | -4.21614300 | 4.39977000  | 1.13509800  |
| H                         | -5.42173800 | 3.86272900  | 1.69556300  | H                         | -6.53781100 | 3.47053800  | 1.15510800  |
| H                         | -1.45633800 | 2.16465700  | 1.22810700  | H                         | -2.29724700 | 2.88705700  | 0.53158100  |
| H                         | -8.17801900 | 0.34130900  | -0.22049300 | H                         | -8.26917300 | -0.95634000 | 0.19757400  |
| H                         | -5.79511200 | -3.57441700 | -1.91155100 | H                         | -4.98587200 | -4.34915900 | -1.03138900 |
| H                         | -3.36590900 | -2.98507500 | -1.38343800 | H                         | -2.79651900 | -3.04150900 | -0.90043900 |
| N                         | -3.02723400 | 1.01552700  | 0.59379100  | N                         | -3.48077400 | 1.23964100  | 0.25701000  |
| N                         | -3.85322000 | -1.19470200 | -0.55777400 | N                         | -3.71535200 | -1.31842100 | -0.34410700 |
| H                         | 1.43795000  | 2.09203400  | -1.30971200 | H                         | 1.88967300  | 2.46094900  | -0.83679100 |
| C                         | 2.51465100  | 2.07878500  | -1.18361900 | C                         | 2.95666200  | 2.28838900  | -0.71293400 |
| C                         | 3.34088800  | 3.15047000  | -1.57761700 | C                         | 3.87673400  | 3.32705800  | -0.87499200 |
| N                         | 3.01547800  | 0.98699400  | -0.61806100 | N                         | 3.31058700  | 1.04733500  | -0.34145900 |
| C                         | 4.70674100  | 3.08009300  | -1.37082200 | C                         | 5.22962500  | 3.09647000  | -0.62781700 |
| H                         | 2.89225400  | 4.02212900  | -2.04282000 | H                         | 3.52039800  | 4.31251400  | -1.15804800 |
| C                         | 4.34757200  | 0.90939400  | -0.40520500 | C                         | 4.64888900  | 0.80011200  | -0.14781700 |
| C                         | 5.25689400  | 1.92987800  | -0.76309500 | C                         | 5.64284500  | 1.81067000  | -0.24606600 |
| H                         | 5.35922100  | 3.89661700  | -1.67012200 | H                         | 5.95977000  | 3.89687900  | -0.71665600 |
| C                         | 4.82042000  | -0.29214000 | 0.22157800  | C                         | 5.00777300  | -0.52903300 | 0.20726300  |
| C                         | 6.65493700  | 1.72677900  | -0.49997300 | C                         | 7.00063100  | 1.46269800  | 0.07355400  |
| C                         | 6.20346700  | -0.47771700 | 0.44878300  | C                         | 6.34849100  | -0.84223100 | 0.55621800  |
| N                         | 3.87672400  | -1.20916600 | 0.54998000  | N                         | 4.00492000  | -1.47077600 | 0.16865600  |
| C                         | 7.10883900  | 0.57420600  | 0.07446800  | C                         | 7.33339200  | 0.20324900  | 0.47587700  |
| H                         | 7.35374200  | 2.51200900  | -0.77662400 | H                         | 7.76148100  | 2.23648900  | 0.00453600  |
| C                         | 6.59298100  | -1.70394100 | 1.03085600  | C                         | 6.63363000  | -2.16113200 | 0.94437200  |
| C                         | 4.27480500  | -2.36303500 | 1.07604100  | C                         | 4.31780100  | -2.71611000 | 0.56765800  |
| H                         | 8.17084000  | 0.43310400  | 0.25697600  | H                         | 8.36206100  | -0.03747700 | 0.73323600  |

|    |             |             |             |    |             |             |             |
|----|-------------|-------------|-------------|----|-------------|-------------|-------------|
| C  | 5.62800600  | -2.64836400 | 1.33389500  | C  | 5.59798400  | -3.09854000 | 0.96378800  |
| H  | 7.64429400  | -1.89882400 | 1.22703100  | H  | 7.64728500  | -2.44046800 | 1.21891500  |
| H  | 3.48315500  | -3.07709700 | 1.28161200  | H  | 3.50510000  | -3.43711300 | 0.53545100  |
| H  | 5.89829700  | -3.60531700 | 1.76835100  | H  | 5.78315000  | -4.12933100 | 1.24964900  |
| Cu | 1.95298900  | -0.65183900 | -0.03380700 | Cu | 2.24378700  | -0.63211500 | -0.19572600 |
| O  | 1.00692000  | -0.74088900 | -1.73289000 | O  | 1.07262500  | -0.57280000 | -1.83045700 |
| O  | 1.16605400  | -2.10472600 | 0.91222500  | O  | 0.97762500  | -1.39175800 | 1.03767400  |
| H  | 0.36331900  | -1.48127800 | -1.70220700 | H  | 0.26623700  | -1.04621700 | -1.57255000 |
| O  | 0.44203800  | 0.94306700  | 0.55521900  | O  | -0.36337900 | 2.14821500  | -0.23181500 |
| O  | -0.49314500 | 0.79568800  | -0.58832500 | O  | -0.85587800 | 1.24499600  | -1.07112400 |
| H  | 0.13034400  | 0.17463300  | -1.24578100 | H  | 0.24614800  | 0.60363400  | -1.69609900 |
| O  | -0.96623500 | -0.74440400 | 1.83116000  | O  | -0.96199900 | 0.21360900  | 1.66138500  |
| H  | -0.31621400 | -1.46667700 | 1.61507200  | H  | -0.20775600 | -0.38847100 | 1.56382800  |
| H  | -0.37765600 | 0.04660300  | 1.54563600  | H  | -0.60766500 | 1.07639300  | 1.35575000  |
| H  | 1.57502900  | -2.15227800 | 1.79110800  | H  | 1.38812300  | -1.87710500 | 1.76669000  |

| <sup>1</sup> <sub>g</sub> |             |             |             | <sup>3</sup> <sub>g</sub> |             |             |             |
|---------------------------|-------------|-------------|-------------|---------------------------|-------------|-------------|-------------|
| Charge=0 Multiplicity = 1 |             |             |             | Charge=0 Multiplicity = 3 |             |             |             |
| Cu                        | -2.01838200 | -0.38950500 | -0.06644900 | Cu                        | -2.02349400 | -0.16939900 | -0.17314400 |
| O                         | -1.14228900 | -1.91529000 | -0.68909900 | O                         | -1.00929100 | -1.63053500 | -0.80021500 |
| H                         | -0.49274000 | -2.19409500 | -0.01521300 | H                         | -0.40765400 | -1.86766100 | -0.05572900 |
| C                         | -4.01344900 | 3.35891600  | 0.94950100  | C                         | -4.40357100 | 3.35572700  | 0.90417300  |
| C                         | -5.34716200 | 2.99733400  | 0.91501100  | C                         | -5.68583300 | 2.84056100  | 0.91339200  |
| C                         | -5.69777600 | 1.67461600  | 0.56115900  | C                         | -5.88755300 | 1.48102100  | 0.58785600  |
| C                         | -4.63050600 | 0.79425400  | 0.27987500  | C                         | -4.73657200 | 0.72356300  | 0.27385900  |
| C                         | -3.01445400 | 2.40696000  | 0.65320100  | C                         | -3.31990400 | 2.52001500  | 0.57105000  |
| C                         | -7.04255800 | 1.17662600  | 0.46117100  | C                         | -7.17027100 | 0.83357500  | 0.55408400  |
| C                         | -4.90030300 | -0.55691500 | -0.12098100 | C                         | -4.86560600 | -0.66522700 | -0.06455000 |
| C                         | -6.22983900 | -1.02209900 | -0.22350400 | C                         | -6.13738300 | -1.27816700 | -0.10073300 |
| C                         | -7.29811200 | -0.11234200 | 0.08766700  | C                         | -7.29099800 | -0.48532400 | 0.22249600  |
| C                         | -6.39768800 | -2.36264200 | -0.63921300 | C                         | -6.17010400 | -2.64489100 | -0.46040700 |
| H                         | -7.39902100 | -2.77522600 | -0.73627100 | H                         | -7.12241800 | -3.16734400 | -0.50449000 |
| C                         | -5.28364900 | -3.13326100 | -0.92255300 | C                         | -4.98820400 | -3.30012200 | -0.75580700 |
| C                         | -3.99628200 | -2.57573800 | -0.78873900 | C                         | -3.76681500 | -2.60064600 | -0.68543100 |
| H                         | -7.86299600 | 1.85331800  | 0.68613600  | H                         | -8.05191100 | 1.42048500  | 0.79722000  |
| H                         | -3.71820800 | 4.37193600  | 1.20365300  | H                         | -4.21570000 | 4.39616400  | 1.14755800  |
| H                         | -6.12800700 | 3.71808700  | 1.14620200  | H                         | -6.53749500 | 3.46721300  | 1.16573200  |
| H                         | -1.94005300 | 2.62532000  | 0.63587400  | H                         | -2.29709800 | 2.88458600  | 0.54027200  |
| H                         | -8.32227300 | -0.46877600 | 0.01404000  | H                         | -8.26960800 | -0.95719100 | 0.19817500  |
| H                         | -5.38736900 | -4.16354800 | -1.24762700 | H                         | -4.98695100 | -4.34761100 | -1.03910100 |
| H                         | -3.07135700 | -3.11120400 | -0.98940500 | H                         | -2.79739800 | -3.04057400 | -0.90542100 |
| N                         | -3.32625900 | 1.15269300  | 0.33948300  | N                         | -3.48089400 | 1.23797700  | 0.26204400  |
| N                         | -3.81854500 | -1.32006300 | -0.39742100 | N                         | -3.71591200 | -1.31865200 | -0.34497000 |
| H                         | 1.59653500  | 2.27062300  | -0.64700200 | H                         | 1.88957400  | 2.46106700  | -0.82966000 |

|    |             |             |             |    |             |             |             |
|----|-------------|-------------|-------------|----|-------------|-------------|-------------|
| C  | 2.69387600  | 2.20178700  | -0.66388300 | C  | 2.95655600  | 2.28807100  | -0.70635000 |
| C  | 3.54166800  | 3.30384500  | -0.91462100 | C  | 3.87675200  | 3.32698400  | -0.86612600 |
| N  | 3.19622100  | 1.01216700  | -0.34179500 | N  | 3.31035800  | 1.04611000  | -0.33780100 |
| C  | 4.91234500  | 3.16279100  | -0.82009200 | C  | 5.22964400  | 3.09563500  | -0.61967100 |
| H  | 3.09677000  | 4.25815900  | -1.17735900 | H  | 3.52051500  | 4.31314400  | -1.14684700 |
| C  | 4.53745800  | 0.86609800  | -0.22029700 | C  | 4.64865200  | 0.79825100  | -0.14491700 |
| C  | 5.45751100  | 1.91114600  | -0.44902700 | C  | 5.64273600  | 1.80889600  | -0.24096000 |
| H  | 5.57603700  | 4.00197400  | -1.01412200 | H  | 5.95988900  | 3.89614600  | -0.70675500 |
| C  | 5.00780000  | -0.42609800 | 0.19757800  | C  | 5.00739900  | -0.53176300 | 0.20703100  |
| C  | 6.85938500  | 1.64410100  | -0.28472700 | C  | 7.00051700  | 1.45999300  | 0.07766700  |
| C  | 6.39260200  | -0.66291300 | 0.35733300  | C  | 6.34812000  | -0.84595700 | 0.55507500  |
| N  | 4.06199800  | -1.37461800 | 0.41918000  | N  | 4.00440800  | -1.47327400 | 0.16637900  |
| C  | 7.30876000  | 0.41326000  | 0.10022400  | C  | 7.33315600  | 0.19956900  | 0.47702200  |
| H  | 7.56503800  | 2.44949000  | -0.47113000 | H  | 7.76146600  | 2.23383600  | 0.01033800  |
| C  | 6.77376100  | -1.96082700 | 0.76544600  | C  | 6.63312700  | -2.16579400 | 0.94013100  |
| C  | 4.44865600  | -2.58598700 | 0.80234700  | C  | 4.31717000  | -2.71957300 | 0.56244900  |
| H  | 8.37287800  | 0.22905500  | 0.22035500  | H  | 8.36182800  | -0.04189700 | 0.73368200  |
| C  | 5.80256200  | -2.92099900 | 0.98630800  | C  | 5.59735300  | -3.10310000 | 0.95751600  |
| H  | 7.82663500  | -2.19495500 | 0.90052400  | H  | 7.64678100  | -2.44590700 | 1.21388600  |
| H  | 3.65176200  | -3.30718700 | 0.96015300  | H  | 3.50436300  | -3.44038600 | 0.52868300  |
| H  | 6.06791600  | -3.92586400 | 1.29776200  | H  | 5.78241400  | -4.13457600 | 1.24096100  |
| Cu | 2.18749200  | -0.74080000 | -0.11300000 | Cu | 2.24334200  | -0.63352400 | -0.19581600 |
| O  | 1.09145000  | -0.55588600 | -1.57128100 | O  | 1.07196500  | -0.57025600 | -1.83024400 |
| O  | 1.13411700  | -1.80721900 | 1.02570100  | O  | 0.97724300  | -1.39584800 | 1.03599300  |
| H  | 0.35542300  | -1.21320700 | -1.49144600 | H  | 0.26554600  | -1.04415700 | -1.57332500 |
| O  | -0.14806300 | 1.89454500  | 0.12586200  | O  | -0.30474000 | 2.20081000  | -0.34066700 |
| O  | -0.79360300 | 1.14556000  | -0.97994800 | O  | -0.85617900 | 1.24604400  | -1.06643400 |
| O  | -0.86354200 | -0.02862100 | 1.60850500  | O  | -0.96207000 | 0.20834000  | 1.66369100  |
| H  | -0.13874400 | -0.70564100 | 1.53495800  | H  | -0.20792500 | -0.39361800 | 1.56463500  |
| H  | -0.45756000 | 0.82628200  | 1.17068300  | H  | -0.60765700 | 1.07178000  | 1.36000800  |
| H  | 1.59317400  | -2.07190200 | 1.83712700  | H  | 1.38777300  | -1.88294100 | 1.76382600  |
| H  | -0.01414400 | 0.59875000  | -1.32298700 | H  | -0.12525400 | 0.64288700  | -1.27343800 |

| <sup>1</sup> TS <sub>6-7</sub> |                  |             |             | <sup>3</sup> TS <sub>6-7</sub> |                  |             |             |
|--------------------------------|------------------|-------------|-------------|--------------------------------|------------------|-------------|-------------|
| Charge=0                       | Multiplicity = 1 |             |             | Charge=0                       | Multiplicity = 3 |             |             |
| Cu                             | -2.03146200      | -0.41845500 | 0.04594800  | Cu                             | -2.03279600      | -0.42315400 | 0.06218800  |
| O                              | -1.14126500      | -1.94164300 | -0.55099500 | O                              | -1.14046800      | -1.94527800 | -0.53402400 |
| H                              | -0.46148000      | -2.18956400 | 0.10514400  | H                              | -0.45764000      | -2.18995900 | 0.12023200  |
| C                              | -4.06825900      | 3.34533900  | 0.95515500  | C                              | -4.07184100      | 3.34279400  | 0.96221200  |
| C                              | -5.39901700      | 2.98002700  | 0.87616600  | C                              | -5.40238800      | 2.97902400  | 0.87338600  |
| C                              | -5.73300000      | 1.65595500  | 0.51209500  | C                              | -5.73510500      | 1.65600400  | 0.50444300  |
| C                              | -4.65380400      | 0.77864300  | 0.26875000  | C                              | -4.65510100      | 0.77792800  | 0.26738900  |
| C                              | -3.05771100      | 2.39428700  | 0.69844300  | C                              | -3.06063800      | 2.39110200  | 0.71071200  |
| C                              | -7.07232200      | 1.15374000  | 0.36859700  | C                              | -7.07392600      | 1.15570600  | 0.35000800  |

|    |             |             |             |    |             |             |             |
|----|-------------|-------------|-------------|----|-------------|-------------|-------------|
| C  | -4.90691500 | -0.57097400 | -0.14899700 | C  | -4.90682000 | -0.57051800 | -0.15516800 |
| C  | -6.23096400 | -1.04117400 | -0.29212000 | C  | -6.23032700 | -1.03870500 | -0.30939300 |
| C  | -7.31171500 | -0.13611600 | -0.01219300 | C  | -7.31205500 | -0.13298200 | -0.03546400 |
| C  | -6.38124800 | -2.38174500 | -0.71425300 | C  | -6.37911300 | -2.37802100 | -0.73603000 |
| H  | -7.37770200 | -2.79840500 | -0.83996800 | H  | -7.37513100 | -2.79304600 | -0.87032300 |
| C  | -5.25643600 | -3.14768600 | -0.96604700 | C  | -5.25343000 | -3.14480200 | -0.98128800 |
| C  | -3.97583400 | -2.58502300 | -0.79498400 | C  | -3.97344100 | -2.58425100 | -0.79900900 |
| H  | -7.90168900 | 1.82763900  | 0.56771000  | H  | -7.90391800 | 1.83020800  | 0.54441100  |
| H  | -3.78416700 | 4.36017800  | 1.21450600  | H  | -3.78842600 | 4.35691200  | 1.22508700  |
| H  | -6.18934900 | 3.69906000  | 1.07852400  | H  | -6.19335900 | 3.69854800  | 1.07143300  |
| H  | -1.98861400 | 2.62552500  | 0.71324000  | H  | -1.99205100 | 2.62259700  | 0.73184700  |
| H  | -8.33176800 | -0.49659300 | -0.11673600 | H  | -8.33173200 | -0.49195600 | -0.14848900 |
| H  | -5.34643900 | -4.17817900 | -1.29450000 | H  | -5.34226000 | -4.17430700 | -1.31312900 |
| H  | -3.04315100 | -3.11740700 | -0.96547300 | H  | -3.04018000 | -3.11744700 | -0.96371100 |
| N  | -3.35301600 | 1.13795700  | 0.37876200  | N  | -3.35471600 | 1.13553200  | 0.38714500  |
| N  | -3.81496800 | -1.32933300 | -0.39588400 | N  | -3.81407700 | -1.32981400 | -0.39540500 |
| H  | 1.63846200  | 2.30569100  | -0.63666600 | H  | 1.64088800  | 2.30868000  | -0.64000200 |
| C  | 2.73232900  | 2.22285600  | -0.65526500 | C  | 2.73414000  | 2.22454100  | -0.66110300 |
| C  | 3.59093100  | 3.31764200  | -0.90002200 | C  | 3.59288700  | 3.31786000  | -0.91150400 |
| N  | 3.22066400  | 1.02394300  | -0.34772700 | N  | 3.22193600  | 1.02602700  | -0.35141600 |
| C  | 4.96048500  | 3.15863200  | -0.81605500 | C  | 4.96252400  | 3.15779500  | -0.83079200 |
| H  | 3.15590900  | 4.28003400  | -1.14923300 | H  | 3.15802600  | 4.27988700  | -1.16236800 |
| C  | 4.56115200  | 0.86079700  | -0.23702700 | C  | 4.56259100  | 0.86198300  | -0.24413100 |
| C  | 5.49262800  | 1.89643100  | -0.46238200 | C  | 5.49441600  | 1.89612900  | -0.47489700 |
| H  | 5.63301300  | 3.99186800  | -1.00504000 | H  | 5.63528300  | 3.98986100  | -1.02402400 |
| C  | 5.01869200  | -0.44035100 | 0.16696200  | C  | 5.02004100  | -0.43851700 | 0.16198900  |
| C  | 6.89234800  | 1.60997300  | -0.31113800 | C  | 6.89427100  | 1.60880600  | -0.32647900 |
| C  | 6.40118200  | -0.69685900 | 0.31361100  | C  | 6.40262900  | -0.69585300 | 0.30596100  |
| N  | 4.06235200  | -1.37699700 | 0.39119300  | N  | 4.06342700  | -1.37374200 | 0.39075300  |
| C  | 7.32898200  | 0.36984300  | 0.05852100  | C  | 7.33072000  | 0.36933500  | 0.04560600  |
| H  | 7.60684300  | 2.40812500  | -0.49487900 | H  | 7.60901100  | 2.40578100  | -0.51431700 |
| C  | 6.76771000  | -2.00314000 | 0.70873500  | C  | 6.76891100  | -2.00139300 | 0.70378100  |
| C  | 4.43413900  | -2.59605700 | 0.76441400  | C  | 4.43490800  | -2.59213100 | 0.76643800  |
| H  | 8.39159500  | 0.17118700  | 0.16867200  | H  | 8.39343300  | 0.17006300  | 0.15365000  |
| C  | 5.78508200  | -2.95110300 | 0.93245000  | C  | 5.78594500  | -2.94784800 | 0.93239400  |
| H  | 7.81834200  | -2.25306200 | 0.83247000  | H  | 7.81960500  | -2.25193100 | 0.82573400  |
| H  | 3.62678400  | -3.30417500 | 0.92803900  | H  | 3.62713100  | -3.29889500 | 0.93377400  |
| H  | 6.03931600  | -3.96161600 | 1.23480300  | H  | 6.04000600  | -3.95773900 | 1.23696400  |
| Cu | 2.19177200  | -0.72146400 | -0.10230500 | Cu | 2.19226900  | -0.71851300 | -0.09881400 |
| O  | 1.04583300  | -0.52991100 | -1.51771000 | O  | 1.03987500  | -0.52762400 | -1.50891300 |
| O  | 1.16417000  | -1.76500700 | 1.07739600  | O  | 1.16944100  | -1.76152200 | 1.08520200  |
| H  | 0.31042600  | -1.18268500 | -1.40443000 | H  | 0.30498200  | -1.18037800 | -1.39176800 |
| O  | -0.14989400 | 1.94780300  | 0.13701200  | O  | -0.16144300 | 1.90554600  | 0.18636000  |
| O  | -0.80180800 | 1.26398700  | -1.00173500 | O  | -0.80096000 | 1.27573200  | -0.99793400 |

|   |             |             |             |   |             |             |             |
|---|-------------|-------------|-------------|---|-------------|-------------|-------------|
| O | -0.84262400 | 0.07952700  | 1.54418200  | O | -0.84237400 | 0.08466000  | 1.54610400  |
| H | -0.11701900 | -0.59570400 | 1.52554200  | H | -0.11626000 | -0.58952600 | 1.53114500  |
| H | -0.42313000 | 0.97969500  | 1.02564700  | H | -0.40712000 | 1.03793600  | 0.97812700  |
| H | 1.62850200  | -1.98390500 | 1.89940600  | H | 1.63480300  | -1.97471100 | 1.90814600  |
| H | -0.04480800 | 0.67926100  | -1.32251100 | H | -0.04714000 | 0.68568600  | -1.31651700 |

| <sup>17</sup>             |             |             |             | <sup>37</sup>             |             |             |             |
|---------------------------|-------------|-------------|-------------|---------------------------|-------------|-------------|-------------|
| Charge=0 Multiplicity = 1 |             |             |             | Charge=0 Multiplicity = 3 |             |             |             |
| Cu                        | -2.15956100 | -0.56195900 | 0.31015200  | Cu                        | -2.03185400 | -0.41958700 | 0.04735500  |
| O                         | -1.16091200 | -1.90395600 | -0.48737100 | O                         | -1.14154400 | -1.94255800 | -0.54995800 |
| H                         | -0.41586400 | -2.11919200 | 0.10785800  | H                         | -0.46156400 | -2.19051800 | 0.10598500  |
| C                         | -4.13667600 | 3.28597900  | 0.95412800  | C                         | -4.06842200 | 3.34460600  | 0.95595400  |
| C                         | -5.45811600 | 2.96500600  | 0.70798600  | C                         | -5.39918700 | 2.97932800  | 0.87692200  |
| C                         | -5.78884300 | 1.65031100  | 0.30752300  | C                         | -5.73318500 | 1.65524400  | 0.51292100  |
| C                         | -4.71669400 | 0.73989200  | 0.19066700  | C                         | -4.65400500 | 0.77787800  | 0.26968100  |
| C                         | -3.13267800 | 2.30450400  | 0.81022000  | C                         | -3.05790400 | 2.39349900  | 0.69935800  |
| C                         | -7.11879700 | 1.18961100  | 0.01349300  | C                         | -7.07252100 | 1.15306800  | 0.36942500  |
| C                         | -4.96933200 | -0.61023300 | -0.23002400 | C                         | -4.90715700 | -0.57175300 | -0.14800300 |
| C                         | -6.28138900 | -1.03820100 | -0.52809100 | C                         | -6.23121900 | -1.04191400 | -0.29112300 |
| C                         | -7.35588200 | -0.09455200 | -0.38755700 | C                         | -7.31194800 | -0.13680500 | -0.01128000 |
| C                         | -6.42640600 | -2.38056900 | -0.94808600 | C                         | -6.38155500 | -2.38250500 | -0.71317600 |
| H                         | -7.41454900 | -2.76594000 | -1.18727400 | H                         | -7.37802400 | -2.79913300 | -0.83886900 |
| C                         | -5.30775900 | -3.18857800 | -1.05491700 | C                         | -5.25677100 | -3.14850400 | -0.96491800 |
| C                         | -4.03976700 | -2.66908900 | -0.72690800 | C                         | -3.97615000 | -2.58588800 | -0.79386500 |
| H                         | -7.94302500 | 1.89115700  | 0.11327700  | H                         | -7.90186700 | 1.82701100  | 0.56847500  |
| H                         | -3.85341700 | 4.28910800  | 1.25536000  | H                         | -3.78430500 | 4.35944900  | 1.21525800  |
| H                         | -6.24314900 | 3.70983700  | 0.81420100  | H                         | -6.18950800 | 3.69839600  | 1.07919800  |
| H                         | -2.08304900 | 2.52230900  | 0.99123900  | H                         | -1.98884700 | 2.62478000  | 0.71425500  |
| H                         | -8.36829700 | -0.42247300 | -0.60850100 | H                         | -8.33200900 | -0.49725800 | -0.11581800 |
| H                         | -5.39363600 | -4.21894700 | -1.38467200 | H                         | -5.34681100 | -4.17901200 | -1.29331500 |
| H                         | -3.11281400 | -3.23317200 | -0.79284700 | H                         | -3.04348700 | -3.11832200 | -0.96430700 |
| N                         | -3.42256700 | 1.06266900  | 0.43535000  | N                         | -3.35320300 | 1.13715700  | 0.37973100  |
| N                         | -3.88839000 | -1.41808100 | -0.31186700 | N                         | -3.81523600 | -1.33018300 | -0.39481500 |
| H                         | 1.94838200  | 2.50671800  | -0.86681400 | H                         | 1.63822200  | 2.30486500  | -0.63608300 |
| C                         | 3.01479700  | 2.31408900  | -0.76242900 | C                         | 2.73209200  | 2.22209600  | -0.65462100 |
| C                         | 3.98287200  | 3.31985200  | -0.97559500 | C                         | 3.59069300  | 3.31695300  | -0.89907100 |
| N                         | 3.36470600  | 1.07682400  | -0.42277000 | N                         | 3.22041400  | 1.02315000  | -0.34721400 |
| C                         | 5.32637100  | 3.02694700  | -0.84468600 | C                         | 4.96024200  | 3.15796600  | -0.81495600 |
| H                         | 3.65294900  | 4.31855300  | -1.24155700 | H                         | 3.15568300  | 4.27938200  | -1.14816500 |
| C                         | 4.68140800  | 0.77967100  | -0.29101800 | C                         | 4.56089100  | 0.86003500  | -0.23634400 |
| C                         | 5.71903800  | 1.71471000  | -0.49347900 | C                         | 5.49237200  | 1.89572400  | -0.46140100 |
| H                         | 6.08357000  | 3.78991900  | -1.00789700 | H                         | 5.63277000  | 3.99125300  | -1.00372100 |
| C                         | 5.00157600  | -0.56987400 | 0.08456100  | C                         | 5.01840000  | -0.44115500 | 0.16753000  |
| C                         | 7.08040300  | 1.28110400  | -0.33617800 | C                         | 6.89207700  | 1.60926600  | -0.30998400 |



|    |             |             |             |    |             |             |             |
|----|-------------|-------------|-------------|----|-------------|-------------|-------------|
| C  | 6.34766500  | -0.97676600 | 0.22489500  | C  | 6.40086300  | -0.69766800 | 0.31436600  |
| N  | 3.95267500  | -1.40621100 | 0.27459900  | N  | 4.06203100  | -1.37782400 | 0.39149200  |
| C  | 7.38343700  | -0.00623900 | 0.00438000  | C  | 7.32868100  | 0.36909000  | 0.05956500  |
| H  | 7.87546700  | 2.00436700  | -0.49751900 | H  | 7.60658700  | 2.40745700  | -0.49350000 |
| C  | 6.56951300  | -2.32810000 | 0.57479500  | C  | 6.76732100  | -2.00400200 | 0.70938700  |
| C  | 4.18484600  | -2.66994200 | 0.61054900  | C  | 4.43372700  | -2.59692900 | 0.76465100  |
| H  | 8.41889600  | -0.31720200 | 0.11375600  | H  | 8.39128300  | 0.17044400  | 0.16984800  |
| C  | 5.48981200  | -3.17236400 | 0.76533200  | C  | 5.78465200  | -2.95198600 | 0.93284500  |
| H  | 7.58659500  | -2.69426000 | 0.68933400  | H  | 7.81793200  | -2.25394600 | 0.83325600  |
| H  | 3.29860400  | -3.28091000 | 0.75597900  | H  | 3.62629700  | -3.30499700 | 0.92811800  |
| H  | 5.63360300  | -4.21420800 | 1.03204700  | H  | 6.03884500  | -3.96253200 | 1.23512800  |
| Cu | 2.15345600  | -0.55783400 | -0.09698300 | Cu | 2.19154600  | -0.72241800 | -0.10206100 |
| O  | 0.86403900  | -0.10635700 | -1.31831200 | O  | 1.04523100  | -0.53085700 | -1.51713900 |
| O  | 1.18292700  | -1.67196200 | 1.05870900  | O  | 1.16440100  | -1.76673000 | 1.07744400  |
| H  | 0.11543600  | -0.74462400 | -1.21633400 | H  | 0.30988800  | -1.18367600 | -1.40377200 |
| O  | 0.16196700  | 2.24065100  | 0.73770300  | O  | -0.14963700 | 1.94631700  | 0.13805400  |
| O  | -0.20407500 | 2.20493400  | -0.68394000 | O  | -0.80208400 | 1.26299000  | -1.00061900 |
| O  | -1.00058600 | 0.07445900  | 1.60532900  | O  | -0.84266800 | 0.07835200  | 1.54501700  |
| H  | -0.23724800 | -0.54407800 | 1.58900800  | H  | -0.11700700 | -0.59675400 | 1.52574600  |
| H  | -0.28574700 | 1.38925500  | 1.08603700  | H  | -0.34762800 | 1.24695500  | 0.78038700  |
| H  | 1.64048900  | -1.81325200 | 1.90161900  | H  | 1.62820400  | -1.98395300 | 1.90021200  |
| H  | 0.18560000  | 1.30944100  | -0.96974000 | H  | -0.04529000 | 0.67819700  | -1.32178000 |

| 8  | Charge=0 Multiplicity = 1 |             |             | 9  | Charge=0 Multiplicity = 1 |             |             |
|----|---------------------------|-------------|-------------|----|---------------------------|-------------|-------------|
| Cu | -1.85458500               | -0.83299000 | -0.13376000 | Cu | 0.13592700                | -0.23541800 | 0.87590200  |
| C  | 0.34358000                | 0.88505700  | -0.08704400 | C  | 2.54943800                | 0.76207700  | -0.10698600 |
| C  | -1.51462000               | 2.23755500  | -0.28884400 | C  | 1.22804300                | 2.60467300  | 0.31924000  |
| C  | 1.20920200                | 1.99354600  | 0.08480100  | C  | 3.68268200                | 1.56289300  | -0.39341600 |
| C  | 0.86954000                | -0.44731100 | -0.05392700 | C  | 2.64819600                | -0.66623100 | -0.16275600 |
| C  | -0.74438000               | 3.39345600  | -0.09128000 | C  | 2.30190000                | 3.47792400  | 0.08967200  |
| H  | -2.58670500               | 2.30323600  | -0.45100200 | H  | 0.24732800                | 2.98619100  | 0.58870000  |
| C  | 0.62578500                | 3.27646900  | 0.08304100  | C  | 3.53273300                | 2.95979300  | -0.28178000 |
| C  | 2.61752500                | 1.75241000  | 0.23354000  | C  | 4.90167300                | 0.91572000  | -0.79198200 |
| C  | 2.26503800                | -0.65709200 | 0.05989700  | C  | 3.85061200                | -1.27860900 | -0.59110400 |
| H  | -1.22693600               | 4.36571200  | -0.10105200 | H  | 2.14969400                | 4.54864500  | 0.18252600  |
| H  | 1.25102900                | 4.15569800  | 0.21458200  | H  | 4.37624200                | 3.61310000  | -0.48904700 |
| C  | 3.12370700                | 0.48663700  | 0.20250800  | C  | 4.97585500                | -0.44118200 | -0.90465300 |
| H  | 3.27842900                | 2.60626100  | 0.35895500  | H  | 5.76669600                | 1.53446800  | -1.01661900 |
| C  | 2.72858800                | -1.98763700 | 0.03746900  | C  | 3.87291900                | -2.68520700 | -0.67332900 |
| C  | 0.43959900                | -2.71861400 | -0.14511500 | C  | 1.60149500                | -2.70829500 | 0.13125000  |
| H  | 4.19326300                | 0.31951900  | 0.30027400  | H  | 5.89996300                | -0.91687500 | -1.22273200 |
| H  | 3.79239400                | -2.19372300 | 0.11780400  | H  | 4.77402300                | -3.19598300 | -1.00154100 |
| C  | 1.80640400                | -3.01623100 | -0.08697400 | C  | 2.73185800                | -3.39449700 | -0.32868600 |

|   |             |             |             |   |             |             |             |
|---|-------------|-------------|-------------|---|-------------|-------------|-------------|
| H | -0.30096600 | -3.51002600 | -0.19966800 | H | 0.71321400  | -3.24624700 | 0.44637000  |
| H | 2.12469200  | -4.05355800 | -0.11413600 | H | 2.70777700  | -4.47818400 | -0.38466700 |
| O | -3.55107000 | -0.80002400 | 0.68331600  | O | -1.95530000 | -0.63441500 | 0.17808300  |
| N | -0.04473000 | -1.46843700 | -0.10189800 | H | -1.96853600 | -0.31258200 | 1.14839900  |
| N | -0.99864200 | 1.00635500  | -0.30443600 | O | -1.00185100 | 0.26691800  | 2.28976000  |
| H | -3.64989100 | -1.39110900 | 1.44264900  | N | 1.54705200  | -1.37307600 | 0.24805500  |
|   |             |             |             | N | 1.32672900  | 1.27748700  | 0.21370200  |
|   |             |             |             | C | -2.65658000 | 0.29238100  | -0.63806000 |
|   |             |             |             | H | -2.32642500 | 0.11046100  | -1.66978700 |
|   |             |             |             | H | -2.37049000 | 1.32617400  | -0.38973600 |
|   |             |             |             | C | -4.16632300 | 0.15000100  | -0.56029500 |
|   |             |             |             | C | -4.99586200 | 1.23116000  | -0.88126300 |
|   |             |             |             | C | -4.75427000 | -1.06839800 | -0.20428700 |
|   |             |             |             | C | -6.38448300 | 1.09727700  | -0.85776800 |
|   |             |             |             | H | -4.55111300 | 2.18868400  | -1.14709500 |
|   |             |             |             | C | -6.14307200 | -1.20379200 | -0.17405900 |
|   |             |             |             | H | -4.10931300 | -1.90091900 | 0.05871600  |
|   |             |             |             | C | -6.96331500 | -0.12305500 | -0.50327300 |
|   |             |             |             | H | -7.01424300 | 1.94800200  | -1.10642200 |
|   |             |             |             | H | -6.58593700 | -2.15575200 | 0.10887700  |
|   |             |             |             | H | -8.04491900 | -0.22832100 | -0.47794000 |
|   |             |             |             | H | -0.94610400 | -0.29243200 | 3.07699100  |

| TS <sub>9-10</sub> |                  |             |             | 10       |                  |             |             |
|--------------------|------------------|-------------|-------------|----------|------------------|-------------|-------------|
| Charge=0           | Multiplicity = 1 |             |             | Charge=0 | Multiplicity = 1 |             |             |
| Cu                 | 0.09342700       | -0.23210000 | 0.84188300  | Cu       | -0.03182300      | -0.21187600 | 0.83508800  |
| C                  | 2.52414400       | 0.75978000  | -0.08528000 | C        | -2.59326000      | -0.60178100 | -0.11762400 |
| C                  | 1.20460800       | 2.58669800  | 0.41527000  | C        | -1.66340900      | -2.66850100 | 0.34276300  |
| C                  | 3.63545700       | 1.57518200  | -0.41179500 | C        | -3.78523700      | -1.18342300 | -0.61339100 |
| C                  | 2.63067400       | -0.66688200 | -0.17085100 | C        | -2.45036500      | 0.82381100  | -0.08265400 |
| C                  | 2.25593300       | 3.47246300  | 0.13694900  | C        | -2.82061500      | -3.32725700 | -0.09204200 |
| H                  | 0.23465200       | 2.95803600  | 0.73261300  | H        | -0.80729600      | -3.22929700 | 0.70411700  |
| C                  | 3.47591900       | 2.97006200  | -0.28665400 | C        | -3.88419200      | -2.58902200 | -0.58814300 |
| C                  | 4.84699600       | 0.94500800  | -0.85734400 | C        | -4.81505700      | -0.31915100 | -1.12075700 |
| C                  | 3.82844000       | -1.26174800 | -0.63590000 | C        | -3.47071900      | 1.65169100  | -0.61269600 |
| H                  | 2.09573800       | 4.54071100  | 0.24308300  | H        | -2.86048600      | -4.41120500 | -0.05351800 |
| H                  | 4.30340700       | 3.63333600  | -0.52418500 | H        | -4.78290300      | -3.07653000 | -0.95602500 |
| C                  | 4.93496900       | -0.41046200 | -0.97584100 | C        | -4.65843700      | 1.03520300  | -1.13494800 |
| H                  | 5.69567100       | 1.57568600  | -1.10922500 | H        | -5.72418200      | -0.77183200 | -1.50799100 |
| C                  | 3.86353900       | -2.66749500 | -0.73223900 | C        | -3.25710900      | 3.04446700  | -0.58283300 |
| C                  | 1.60658000       | -2.71995700 | 0.10824000  | C        | -1.14009100      | 2.63586400  | 0.48861500  |
| H                  | 5.85423200       | -0.87358000 | -1.32493800 | H        | -5.44025000      | 1.67539200  | -1.53541200 |
| H                  | 4.76217100       | -3.16491500 | -1.08681100 | H        | -4.01217600      | 3.71680800  | -0.98145200 |
| C                  | 2.73904300       | -3.39244700 | -0.36958700 | C        | -2.07931200      | 3.53334600  | -0.04006500 |

|   |             |             |             |   |             |             |             |
|---|-------------|-------------|-------------|---|-------------|-------------|-------------|
| H | 0.72406500  | -3.27016400 | 0.41955100  | H | -0.21871200 | 2.99671500  | 0.93666500  |
| H | 2.72556700  | -4.47583700 | -0.43426300 | H | -1.88067200 | 4.59966100  | 0.00037300  |
| O | -1.90789600 | -0.54735300 | 0.29840100  | O | 1.80334100  | 0.11664700  | 0.45894900  |
| H | -1.83475400 | -0.31536000 | 1.41393900  | H | 1.73415800  | -0.44069700 | 2.03545500  |
| O | -1.06222200 | 0.02216000  | 2.40884800  | O | 1.01735100  | -0.70702900 | 2.69407400  |
| N | 1.53727000  | -1.38763500 | 0.23097200  | N | -1.30862200 | 1.31046700  | 0.48880700  |
| N | 1.31339400  | 1.25934700  | 0.30447200  | N | -1.52201000 | -1.33575600 | 0.31970400  |
| C | -2.60010100 | 0.46200500  | -0.40112900 | C | 2.48584800  | -0.59426000 | -0.52211400 |
| H | -2.19651800 | 0.51293700  | -1.42450100 | H | 2.06040800  | -0.39712200 | -1.52650500 |
| H | -2.42089100 | 1.45337400  | 0.05134100  | H | 2.40523200  | -1.69316400 | -0.38544600 |
| C | -4.10029300 | 0.22526800  | -0.48204100 | C | 3.97067000  | -0.25113300 | -0.58457600 |
| C | -4.95508000 | 1.25267300  | -0.90171000 | C | 4.84342100  | -1.00551300 | -1.38002900 |
| C | -4.65087300 | -1.01996100 | -0.16720500 | C | 4.48778300  | 0.82870200  | 0.13530800  |
| C | -6.32902000 | 1.04028500  | -1.01040900 | C | 6.19874300  | -0.68728900 | -1.45823000 |
| H | -4.54080400 | 2.23084400  | -1.14220700 | H | 4.45573200  | -1.85418200 | -1.94254700 |
| C | -6.02696900 | -1.23544000 | -0.27089300 | C | 5.84538700  | 1.15074200  | 0.06233700  |
| H | -3.98466200 | -1.80977100 | 0.16395600  | H | 3.80424200  | 1.40407900  | 0.75090100  |
| C | -6.87114200 | -0.20805800 | -0.69397700 | C | 6.70653800  | 0.39560700  | -0.73467100 |
| H | -6.97801800 | 1.85014000  | -1.33521300 | H | 6.86104700  | -1.28585400 | -2.07973400 |
| H | -6.44054600 | -2.20937800 | -0.01929900 | H | 6.23199200  | 1.99428800  | 0.63046600  |
| H | -7.94240200 | -0.37522600 | -0.77321200 | H | 7.76348400  | 0.64445400  | -0.79122800 |
| H | -1.03695200 | -0.67222700 | 3.08304000  | H | 1.05861900  | -0.05966100 | 3.41505100  |

| <sup>1</sup> 11           |             |             |             | <sup>3</sup> 11           |             |             |             |
|---------------------------|-------------|-------------|-------------|---------------------------|-------------|-------------|-------------|
| Charge=0 Multiplicity = 1 |             |             |             | Charge=0 Multiplicity = 1 |             |             |             |
| Cu                        | 0.17967500  | -0.99280100 | -0.52993900 | Cu                        | 0.01917800  | -1.00810600 | 0.20638800  |
| C                         | -2.32832600 | 0.13811300  | 0.29862200  | C                         | 2.55404600  | 0.22019200  | -0.21677200 |
| C                         | -2.31442700 | -2.10468700 | 0.84774300  | C                         | 2.73618300  | -2.05394400 | -0.58080800 |
| C                         | -3.62976400 | 0.33461600  | 0.81166800  | C                         | 3.91513400  | 0.45214700  | -0.52147400 |
| C                         | -1.61549600 | 1.23772800  | -0.28958600 | C                         | 1.70071600  | 1.31687200  | 0.14550400  |
| C                         | -3.61509000 | -2.01118900 | 1.38005700  | C                         | 4.09890100  | -1.92436600 | -0.90642200 |
| H                         | -1.76329200 | -3.03974900 | 0.84259400  | H                         | 2.22498700  | -3.00935600 | -0.60623200 |
| C                         | -4.27213200 | -0.79537100 | 1.36589100  | C                         | 4.68943500  | -0.67480100 | -0.87527300 |
| C                         | -4.20870100 | 1.64799300  | 0.73893200  | C                         | 4.42094800  | 1.79493000  | -0.45620400 |
| C                         | -2.20467400 | 2.51936100  | -0.34878900 | C                         | 2.22425300  | 2.62805700  | 0.20325000  |
| H                         | -4.08360600 | -2.89673400 | 1.79621700  | H                         | 4.66828200  | -2.80642000 | -1.17943800 |
| H                         | -5.27503100 | -0.69933500 | 1.77389700  | H                         | 5.74069200  | -0.54939100 | -1.12151700 |
| C                         | -3.52720900 | 2.69333200  | 0.18485200  | C                         | 3.61078900  | 2.83692900  | -0.10666200 |
| H                         | -5.20921300 | 1.79516300  | 1.13646600  | H                         | 5.46788900  | 1.96706500  | -0.69025900 |
| C                         | -1.43147200 | 3.54424900  | -0.94131100 | C                         | 1.32478100  | 3.65607800  | 0.56913100  |
| C                         | 0.33041300  | 1.93945900  | -1.31843600 | C                         | -0.41557900 | 1.99908400  | 0.76270800  |
| H                         | -3.98048200 | 3.67985400  | 0.13860400  | H                         | 4.00676100  | 3.84768200  | -0.05715300 |
| H                         | -1.83608100 | 4.55065600  | -1.01261000 | H                         | 1.67664200  | 4.68291200  | 0.62875000  |
| C                         | -0.16880900 | 3.25322100  | -1.42369000 | C                         | 0.00897300  | 3.34061300  | 0.84810700  |

|   |             |             |             |   |             |             |             |
|---|-------------|-------------|-------------|---|-------------|-------------|-------------|
| H | 1.30952600  | 1.63836600  | -1.67877700 | H | -1.43605400 | 1.69569400  | 0.97548100  |
| H | 0.44420300  | 4.02134900  | -1.88341900 | H | -0.70403800 | 4.10767500  | 1.13158100  |
| O | 1.75944100  | -0.70148600 | -1.50775000 | O | -1.58745600 | -0.85929800 | 1.14015200  |
| H | 0.68081300  | -2.00314800 | -2.53369300 | H | -0.70318600 | -2.08496600 | 2.15803400  |
| O | -0.21054300 | -2.37212800 | -2.35002000 | O | 0.08158500  | -2.64963300 | 2.37421800  |
| N | -0.37775000 | 0.96570000  | -0.76204200 | N | 0.40552100  | 1.01929300  | 0.41314500  |
| N | -1.68832700 | -1.05732200 | 0.32280000  | N | 1.98779100  | -1.01107300 | -0.24106100 |
| C | 3.02084300  | -1.03368900 | -0.98809800 | C | -2.84188900 | -1.34074900 | 0.72865100  |
| H | 3.76331200  | -0.98040600 | -1.80279400 | H | -3.40511800 | -1.66003700 | 1.62188200  |
| H | 3.04522900  | -2.06664300 | -0.60303100 | H | -2.74666300 | -2.23125400 | 0.08385800  |
| C | 3.45246000  | -0.08885300 | 0.12335200  | C | -3.64089100 | -0.27546000 | -0.00167300 |
| C | 4.16998100  | 1.08011400  | -0.16132600 | C | -4.15846100 | 0.81835900  | 0.71160700  |
| C | 3.08979800  | -0.34181500 | 1.45458600  | C | -3.84805400 | -0.32055600 | -1.38399900 |
| C | 4.51675400  | 1.97672600  | 0.85161500  | C | -4.85894200 | 1.83449100  | 0.06367700  |
| H | 4.46736500  | 1.28207900  | -1.18901100 | H | -4.01038400 | 0.86135900  | 1.78899500  |
| C | 3.43251900  | 0.55213300  | 2.47107700  | C | -4.54796000 | 0.69650100  | -2.04186000 |
| H | 2.54596700  | -1.25473300 | 1.68857300  | H | -3.45644600 | -1.16359700 | -1.94959000 |
| C | 4.14668100  | 1.71517400  | 2.17250100  | C | -5.05590600 | 1.77625100  | -1.32042100 |
| H | 5.08249300  | 2.87444200  | 0.61236600  | H | -5.26408100 | 2.66642900  | 0.63564900  |
| H | 3.15104700  | 0.33588200  | 3.49912300  | H | -4.70035500 | 0.64038300  | -3.11716200 |
| H | 4.42028600  | 2.40813800  | 2.96442700  | H | -5.60966400 | 2.56218800  | -1.82794800 |
| H | -0.03110800 | -3.12304800 | -1.73499000 | H | -0.10766700 | -3.47598800 | 1.89932600  |
| O | 0.40486100  | -3.70791200 | -0.02602700 | O | -0.86712100 | -3.59652700 | -0.34892900 |
| O | 0.72879900  | -2.54713000 | 0.51517500  | O | -0.18323400 | -2.58911800 | -0.82675300 |

| <sup>1</sup> TS <sub>11-12</sub> |             |             |             | <sup>3</sup> TS <sub>11-12</sub> |             |             |             |
|----------------------------------|-------------|-------------|-------------|----------------------------------|-------------|-------------|-------------|
| Charge=0 Multiplicity = 1        |             |             |             | Charge=0 Multiplicity = 3        |             |             |             |
| Cu                               | -0.03598500 | -0.40706600 | 0.48918600  | Cu                               | -0.09251700 | -0.61095500 | 0.68685500  |
| C                                | 2.69186900  | -0.29158000 | -0.33177000 | C                                | 2.51076800  | -0.19354900 | -0.43510400 |
| C                                | 1.93761700  | -2.46975200 | -0.54878300 | C                                | 1.89980200  | -2.38511100 | -0.83479300 |
| C                                | 3.99208100  | -0.61040500 | -0.77883800 | C                                | 3.76719200  | -0.34734800 | -1.06189600 |
| C                                | 2.36762500  | 1.05785200  | 0.04004000  | C                                | 2.13938100  | 1.07828400  | 0.12234500  |
| C                                | 3.20692900  | -2.88438900 | -1.00203000 | C                                | 3.12894900  | -2.63864200 | -1.47498400 |
| H                                | 1.09333400  | -3.14682000 | -0.41736200 | H                                | 1.13827300  | -3.15078700 | -0.71525900 |
| C                                | 4.22980300  | -1.96197100 | -1.11989900 | C                                | 4.06130800  | -1.62475000 | -1.59016900 |
| C                                | 4.96878500  | 0.44089000  | -0.85830800 | C                                | 4.64964900  | 0.78543400  | -1.12609900 |
| C                                | 3.34201700  | 2.07574700  | -0.05622100 | C                                | 3.01797600  | 2.18056400  | 0.03550300  |
| H                                | 3.36459100  | -3.92796700 | -1.25336800 | H                                | 3.32740200  | -3.62932400 | -1.87017300 |
| H                                | 5.21386800  | -2.26349500 | -1.46986800 | H                                | 5.01511000  | -1.79817100 | -2.08183900 |
| C                                | 4.65795800  | 1.72587600  | -0.51597400 | C                                | 4.29129300  | 1.99510600  | -0.60406800 |
| H                                | 5.96939400  | 0.19345500  | -1.20248300 | H                                | 5.61616600  | 0.66134700  | -1.60699300 |
| C                                | 2.93623900  | 3.37851900  | 0.31242200  | C                                | 2.56300600  | 3.39802000  | 0.59155000  |
| C                                | 0.73839000  | 2.51318700  | 0.79922300  | C                                | 0.50469500  | 2.30213100  | 1.20946000  |
| H                                | 5.40804600  | 2.50888900  | -0.58615400 | H                                | 4.96966500  | 2.84167700  | -0.66640300 |

|   |             |             |             |   |             |             |             |
|---|-------------|-------------|-------------|---|-------------|-------------|-------------|
| H | 3.64698000  | 4.19917800  | 0.25831300  | H | 3.20018400  | 4.27788700  | 0.55386500  |
| C | 1.63646100  | 3.59605400  | 0.73272500  | C | 1.30861600  | 3.45828700  | 1.17193900  |
| H | -0.29554300 | 2.62684000  | 1.11097200  | H | -0.49522900 | 2.28327200  | 1.63425600  |
| H | 1.29827000  | 4.58766500  | 1.01447900  | H | 0.93440500  | 4.38285900  | 1.59886700  |
| O | -1.64178800 | 0.58296300  | 0.59582700  | O | -1.65452700 | 0.22502200  | 1.25762300  |
| H | -0.53388400 | -1.53731400 | 2.93976500  | H | -0.19862600 | -1.95087100 | 3.02670500  |
| O | 0.11398800  | -1.71286400 | 2.24100300  | O | 0.41982200  | -2.10730800 | 2.29609000  |
| N | 1.10107500  | 1.27976600  | 0.46853700  | N | 0.91970500  | 1.14735800  | 0.70378200  |
| N | 1.69411200  | -1.20128300 | -0.23482600 | N | 1.59887800  | -1.19173000 | -0.33355900 |
| C | -2.70781700 | -0.24765300 | 0.65162900  | C | -2.76717400 | -0.52881600 | 0.90044900  |
| H | -2.86387900 | -0.77979800 | 1.61069900  | H | -3.29338700 | -0.95847900 | 1.77472100  |
| H | -2.16525300 | -1.34831700 | 0.00419000  | H | -2.28783600 | -1.47853300 | 0.32129900  |
| C | -3.96087800 | 0.18166000  | 0.01175800  | C | -3.74243600 | 0.15928100  | -0.00915100 |
| C | -3.97493400 | 1.23043400  | -0.92721700 | C | -3.36098000 | 1.27299500  | -0.77112200 |
| C | -5.17120100 | -0.48342800 | 0.29031200  | C | -5.05047400 | -0.33024200 | -0.15774500 |
| C | -5.15902400 | 1.60264700  | -1.55791900 | C | -4.25678100 | 1.87868500  | -1.65246000 |
| H | -3.04247600 | 1.74399100  | -1.13823900 | H | -2.35453800 | 1.65969400  | -0.64529400 |
| C | -6.35226500 | -0.11314700 | -0.34532900 | C | -5.94664300 | 0.27050400  | -1.03950400 |
| H | -5.17471900 | -1.29691700 | 1.01332400  | H | -5.36500700 | -1.19145700 | 0.42936900  |
| C | -6.35367400 | 0.93370700  | -1.27345300 | C | -5.55386900 | 1.38064600  | -1.79311500 |
| H | -5.15378000 | 2.41888900  | -2.27687800 | H | -3.94322100 | 2.74518500  | -2.23114700 |
| H | -7.27676400 | -0.63743800 | -0.11551900 | H | -6.95592000 | -0.12323200 | -1.13634900 |
| H | -7.27649800 | 1.22460700  | -1.76867000 | H | -6.25291700 | 1.85299100  | -2.47884700 |
| H | -0.32064600 | -2.45386700 | 1.62661700  | H | -0.03645700 | -2.79345400 | 1.71279000  |
| O | -0.93061100 | -3.08442800 | 0.43402300  | O | -0.93222800 | -3.30995800 | 0.42052300  |
| O | -1.11279700 | -1.89836400 | -0.30915300 | O | -1.20191900 | -2.09165800 | -0.10125500 |

| 12r | Charge=0 Multiplicity = 1 |             |             | 12u | Charge=0 Multiplicity = 1 |             |             |
|-----|---------------------------|-------------|-------------|-----|---------------------------|-------------|-------------|
| Cu  | -0.11102900               | -0.68075500 | -0.28134500 | Cu  | -0.80481400               | -1.07258500 | -0.05814100 |
| C   | -2.87275500               | -0.07930300 | -0.23199800 | C   | -3.36333900               | 0.03070200  | -0.08072700 |
| C   | -2.58893900               | -2.33029800 | -0.73121100 | C   | -3.62741600               | -2.26325500 | -0.09338500 |
| C   | -4.28645600               | -0.18267500 | -0.25688300 | C   | -4.75213200               | 0.25476600  | -0.25121500 |
| C   | -2.23683200               | 1.15908800  | 0.04045700  | C   | -2.46040100               | 1.13781000  | -0.00264900 |
| C   | -3.97693000               | -2.52412500 | -0.77562800 | C   | -5.00779100               | -2.14088700 | -0.30524600 |
| H   | -1.87374700               | -3.12779400 | -0.90655300 | H   | -3.15626200               | -3.23812500 | -0.01005800 |
| C   | -4.82980300               | -1.44852900 | -0.53739700 | C   | -5.58047100               | -0.87842400 | -0.36869400 |
| C   | -5.05135800               | 1.00574200  | 0.00664200  | C   | -5.23164100               | 1.60902100  | -0.27365300 |
| C   | -3.00684700               | 2.32203300  | 0.29248500  | C   | -2.96147600               | 2.46244800  | 0.01238500  |
| H   | -4.37038100               | -3.51131700 | -0.99289900 | H   | -5.61676700               | -3.03583400 | -0.38682400 |
| H   | -5.90857000               | -1.57897500 | -0.56600200 | H   | -6.65207400               | -0.75507800 | -0.50201700 |
| C   | -4.44108900               | 2.19838900  | 0.26867600  | C   | -4.37844800               | 2.66244200  | -0.12490900 |
| H   | -6.13607600               | 0.93745400  | -0.00673800 | H   | -6.29855500               | 1.77845700  | -0.39536600 |
| C   | -2.30847800               | 3.51542200  | 0.54386000  | C   | -2.03016700               | 3.51018900  | 0.14751200  |

|   |             |             |             |   |             |             |             |
|---|-------------|-------------|-------------|---|-------------|-------------|-------------|
| C | -0.23273900 | 2.30819600  | 0.27935400  | C | -0.26890000 | 1.86272400  | 0.17190000  |
| H | -5.03736800 | 3.08576600  | 0.46468900  | H | -4.75756800 | 3.68125200  | -0.12353600 |
| H | -2.85523600 | 4.43228400  | 0.74657200  | H | -2.37157200 | 4.54163300  | 0.16898000  |
| C | -0.91144300 | 3.50367700  | 0.52725200  | C | -0.68173700 | 3.19767900  | 0.25096300  |
| H | 0.85082700  | 2.25551200  | 0.26098500  | H | 0.78456300  | 1.60330200  | 0.21149700  |
| H | -0.34366700 | 4.40992300  | 0.70945100  | H | 0.06573600  | 3.97691100  | 0.36289900  |
| O | 1.67011000  | 0.06633000  | -0.39227900 | O | 2.72419300  | 0.23140200  | 0.96032100  |
| H | 1.21066900  | -2.51964000 | -1.11319800 | H | 0.32677900  | -2.24781900 | -1.89567900 |
| O | 0.37026300  | -2.46683400 | -0.63386300 | O | -0.10336300 | -2.50942600 | -1.06971800 |
| N | -0.86634600 | 1.15308700  | 0.03981500  | N | -1.12135200 | 0.83673800  | 0.01507900  |
| N | -2.04775000 | -1.14076200 | -0.47062800 | N | -2.81179700 | -1.21297300 | 0.03848000  |
| C | 2.72564300  | -0.54469700 | 0.01038200  | C | 3.63109400  | -0.49609400 | 0.55966400  |
| H | 2.61428000  | -1.51573700 | 0.50860100  | H | 3.47292700  | -1.58775000 | 0.53028300  |
| C | 4.04599500  | -0.01788100 | -0.14557000 | C | 4.93970500  | 0.00049600  | 0.10565400  |
| C | 4.28838700  | 1.21456500  | -0.80608200 | C | 5.23339300  | 1.37403400  | 0.11446000  |
| C | 5.15547300  | -0.73393300 | 0.37163100  | C | 5.90182400  | -0.91820000 | -0.33854600 |
| C | 5.58131900  | 1.70106400  | -0.93310600 | C | 6.47709100  | 1.81895200  | -0.31822100 |
| H | 3.44451900  | 1.76080000  | -1.21531200 | H | 4.47466500  | 2.06688000  | 0.46496400  |
| C | 6.44412000  | -0.23721900 | 0.23942400  | C | 7.14800800  | -0.47013600 | -0.77263100 |
| H | 4.98410400  | -1.68144300 | 0.87809300  | H | 5.66654400  | -1.98005000 | -0.34085300 |
| C | 6.66795200  | 0.98380100  | -0.41232700 | C | 7.43364700  | 0.89711000  | -0.76190600 |
| H | 5.75339100  | 2.64562800  | -1.44353800 | H | 6.70880800  | 2.88033300  | -0.31231500 |
| H | 7.28292100  | -0.79860000 | 0.64295500  | H | 7.89366400  | -1.18078100 | -1.11711700 |
| H | 7.67795500  | 1.37042200  | -0.51569500 | H | 8.40510900  | 1.24823400  | -1.09964000 |
| H | 0.69659400  | -2.84432700 | 0.87914000  | H | 0.90773100  | -2.77839400 | 0.02651400  |
| O | 0.86760000  | -2.80558400 | 1.88370000  | O | 1.40375100  | -2.69533400 | 0.94117200  |
| O | 0.28838500  | -1.48540000 | 2.12674000  | O | 0.62421800  | -1.56316900 | 1.45364500  |
| H | 1.06611400  | -1.01233200 | 2.47001300  | H | 1.30248500  | -0.85058800 | 1.42155500  |

<sup>3</sup>12

Charge=0 Multiplicity = 3

|    |             |             |             |
|----|-------------|-------------|-------------|
| Cu | -0.11102900 | -0.68075500 | -0.28134500 |
| C  | -2.87275500 | -0.07930300 | -0.23199800 |
| C  | -2.58893900 | -2.33029800 | -0.73121100 |
| C  | -4.28645600 | -0.18267500 | -0.25688300 |
| C  | -2.23683200 | 1.15908800  | 0.04045700  |
| C  | -3.97693000 | -2.52412500 | -0.77562800 |
| H  | -1.87374700 | -3.12779400 | -0.90655300 |
| C  | -4.82980300 | -1.44852900 | -0.53739700 |
| C  | -5.05135800 | 1.00574200  | 0.00664200  |
| C  | -3.00684700 | 2.32203300  | 0.29248500  |
| H  | -4.37038100 | -3.51131700 | -0.99289900 |
| H  | -5.90857000 | -1.57897500 | -0.56600200 |
| C  | -4.44108900 | 2.19838900  | 0.26867600  |

|   |             |             |             |
|---|-------------|-------------|-------------|
| H | -6.13607600 | 0.93745400  | -0.00673800 |
| C | -2.30847800 | 3.51542200  | 0.54386000  |
| C | -0.23273900 | 2.30819600  | 0.27935400  |
| H | -5.03736800 | 3.08576600  | 0.46468900  |
| H | -2.85523600 | 4.43228400  | 0.74657200  |
| C | -0.91144300 | 3.50367700  | 0.52725200  |
| H | 0.85082700  | 2.25551200  | 0.26098500  |
| H | -0.34366700 | 4.40992300  | 0.70945100  |
| O | 1.67011000  | 0.06633000  | -0.39227900 |
| H | 1.21066900  | -2.51964000 | -1.11319800 |
| O | 0.37026300  | -2.46683400 | -0.63386300 |
| N | -0.86634600 | 1.15308700  | 0.03981500  |
| N | -2.04775000 | -1.14076200 | -0.47062800 |
| C | 2.72564300  | -0.54469700 | 0.01038200  |
| H | 2.61428000  | -1.51573700 | 0.50860100  |
| C | 4.04599500  | -0.01788100 | -0.14557000 |
| C | 4.28838700  | 1.21456500  | -0.80608200 |
| C | 5.15547300  | -0.73393300 | 0.37163100  |
| C | 5.58131900  | 1.70106400  | -0.93310600 |
| H | 3.44451900  | 1.76080000  | -1.21531200 |
| C | 6.44412000  | -0.23721900 | 0.23942400  |
| H | 4.98410400  | -1.68144300 | 0.87809300  |
| C | 6.66795200  | 0.98380100  | -0.41232700 |
| H | 5.75339100  | 2.64562800  | -1.44353800 |
| H | 7.28292100  | -0.79860000 | 0.64295500  |
| H | 7.67795500  | 1.37042200  | -0.51569500 |
| H | 0.69659400  | -2.84432700 | 0.87914000  |
| O | 0.86760000  | -2.80558400 | 1.88370000  |
| O | 0.28838500  | -1.48540000 | 2.12674000  |
| H | 1.06611400  | -1.01233200 | 2.47001300  |
